1     **Antiviral function and viral antagonism of the rapidly evolving dynein**  
2                                     **activating adapter NINL**

3  
4     **Authors**

5     Donté Alexander Stevens<sup>1,\*</sup>, Christopher Beierschmitt<sup>2,\*</sup>, Swetha Mahesula<sup>1,3</sup>, Miles R. Corley<sup>2</sup>,  
6     John Salogiannis<sup>1,4</sup>, Brian V. Tsu<sup>2</sup>, Bryant Cao<sup>2</sup>, Andrew P. Ryan<sup>2</sup>, Samara L. Reck-Peterson<sup>1,3,5,‡</sup>,  
7     and Matthew D. Daugherty<sup>2,‡</sup>

8  
9     <sup>1</sup>Department of Cellular and Molecular Medicine, University of California, San Diego; San Diego,  
10    CA, United States

11    <sup>2</sup>Department of Molecular Biology, University of California, San Diego; San Diego, CA, United  
12    States

13    <sup>3</sup>Howard Hughes Medical Institute; Chevy Chase, MD, United States

14    <sup>4</sup>Current address, Department of Molecular Physiology and Biophysics, University of Vermont,  
15    Burlington VT, United States

16    <sup>5</sup>Department of Cell and Developmental Biology, University of California, San Diego; San Diego,  
17    CA, United States

18  
19    \* These authors contributed equally

20    ‡ Co-corresponding authors: Matthew D. Daugherty ([mddaugherty@ucsd.edu](mailto:mddaugherty@ucsd.edu)) and Samara L.  
21    Reck-Peterson ([sreckpeterson@health.ucsd.edu](mailto:sreckpeterson@health.ucsd.edu))

22

23

## 24 **Abstract**

25

26 Viruses interact with the intracellular transport machinery to promote viral replication. Such host-  
27 virus interactions can drive host gene adaptation, leaving signatures of pathogen-driven evolution  
28 in host genomes. Here we leverage these genetic signatures to identify the dynein activating  
29 adaptor, ninein-like (NINL), as a critical component in the antiviral innate immune response and  
30 as a target of viral antagonism. Unique among genes encoding components of active dynein  
31 complexes, NINL has evolved under recurrent positive (diversifying) selection, particularly in its  
32 carboxy-terminal cargo binding region. Consistent with a role for NINL in host immunity, we  
33 demonstrate that NINL knockout cells exhibit an impaired response to interferon, resulting in  
34 increased permissiveness to viral replication. Moreover, we show that proteases encoded by  
35 diverse picornaviruses and coronaviruses cleave and disrupt NINL function in a host- and virus-  
36 specific manner. Our work reveals the importance of NINL in the antiviral response and the utility  
37 of using signatures of host-virus conflicts to uncover new components of antiviral immunity and  
38 targets of viral antagonism.

39

## 40 **Introduction**

41

42 Viruses interact directly with host proteins at nearly every step of their replication cycle. Such  
43 molecular interactions can either benefit the host (*e.g.*, immune recognition) or the virus (*e.g.*,  
44 viral co-option of host machinery or viral antagonism of host immunity) and are thus critical  
45 determinants of the outcome of a viral infection. Competing genetic innovations on both sides of  
46 these host-virus conflicts result in signatures of recurrent adaptation that have been described as  
47 molecular ‘arms races’ (Daugherty and Malik, 2012; Duggal and Emerman, 2012; Tenthorey et  
48 al., 2022). Indeed, many host antiviral factors that directly interact with viral proteins display  
49 signatures of recurrent positive (diversifying) selection over evolutionary time, and genetic

50 variation in these host-virus interactions shapes species-specific susceptibility to circulating and  
51 emerging pathogens (Daugherty and Malik, 2012; Duggal and Emerman, 2012; Tenthorey et al.,  
52 2022; Meyerson and Sawyer, 2011; Rothenburg and Brennan, 2020). These data suggest that  
53 there is great potential to use evolutionary signatures of rapid evolution not only as an approach  
54 to more deeply understand known host-virus conflicts but also as a means to discover new  
55 proteins engaged in viral interactions (Daugherty and Malik, 2012). Compellingly, it is estimated  
56 that around 30% of all adaptive amino acid changes in humans result from viral selective pressure  
57 (Enard et al., 2016; Enard and Petrov, 2018), suggesting that many host-virus conflicts remain  
58 undescribed.

59

60 One potential source of host-virus conflicts is over the active transport of macromolecules within  
61 the cell. The relatively large size of eukaryotic cells, coupled with the density of macromolecules  
62 in the cytoplasm, limits the effectiveness of diffusion to localize and transport large intracellular  
63 components, such as organelles, membrane vesicles, RNAs, and protein complexes (Luby-  
64 Phelps, 2000; Seksek et al., 1997). Eukaryotic cells overcome this problem by actively  
65 transporting large intracellular cargos using dynein and kinesin motors, which move on  
66 microtubules in opposite directions. Aspects of viral infection, viral replication, and the host  
67 immune response all require microtubule-based transport. For example, viruses co-opt the  
68 microtubule cytoskeleton for cell entry, transport of viral components to sites of replication,  
69 remodeling of cellular compartments, and viral egress (Brandenburg and Zhuang, 2007; Dodding  
70 and Way, 2011; Döhner et al., 2005; Radtke et al., 2006). Similarly, in response to infection, the  
71 host adaptive and innate immune response require movement of signaling components, transport  
72 of endocytic and exocytic vesicles, organelle recycling, and cellular remodeling, all of which  
73 require the microtubule-based trafficking machinery (Ilan-Ber and Ilan, 2019; Kast and  
74 Dominguez, 2017; Man and Kanneganti, 2016; Mostowy and Shenoy, 2015). Despite the clear

75 role of microtubule-based transport in both aiding and inhibiting viral replication, the degree to  
76 which host-virus conflicts shape the basic biology of this machinery is poorly understood.

77

78 To uncover the role of this machinery in viral replication and the immune response, we set out to  
79 determine if there were undescribed genetic conflicts between viruses and the intracellular  
80 transport machinery. Specifically, we focused on the dynein transport machinery, which traffics  
81 dozens of cellular cargos towards microtubule minus-ends (generally anchored to centrosomes  
82 near the nucleus). In human cells, only one dynein motor-containing gene, cytoplasmic dynein-1  
83 (*DYNC1H1*), is responsible for long-distance transport in the cytoplasm. However, the active  
84 cytoplasmic dynein-1 complex (dynein hereafter) is composed of multiple dynein subunits, the  
85 multisubunit dynactin complex, and one of a growing list of activating adaptors (McKenney et al.,  
86 2014; Schlager et al., 2014). Interestingly, it is the activating adaptors that provide cargo  
87 specificity for dynein in addition to their essential role in activating robust processive motility  
88 (Olenick and Holzbaaur, 2019; Reck-Peterson et al., 2018). However, the specific biological  
89 functions of most activating adaptors remain unknown.

90

91 We now show that one activating adaptor, ninein-like protein (NINL, also known as NLP), has  
92 evolved under recurrent positive selection in primates, making it unique among all analyzed  
93 dynein, dynactin, and activating adaptor genes. Based on the hypothesis that such an  
94 evolutionary signature in NINL could be the result of a previously undescribed host-virus conflict,  
95 we explored the function of NINL in the antiviral immune response. Using NINL knockout (KO)  
96 cells, we find that NINL is important for limiting viral infection, especially in the presence of the  
97 antiviral signaling cytokine, type I interferon (IFN). We further demonstrate that this attenuation of  
98 the antiviral efficacy of IFN in NINL KO cells is due to a dramatic decrease in interferon-stimulated  
99 gene (ISG) production. Finally, we show that diverse proteases from picornaviruses and  
100 coronaviruses cleave NINL at several host-specific sites, resulting in a disruption of NINL's ability

101 to traffic cargo. Together, our results reveal a novel immune function for NINL as well as a means  
102 by which viruses may antagonize NINL function in a virus- and host-specific manner. More  
103 broadly, our work implicates a component of the dynein transport machinery as a rapidly evolving  
104 barrier to viral replication, and highlights the utility of an evolution-guided approach for discovery  
105 of new host-virus conflicts.

106

## 107 **Results**

108

### 109 **The dynein activating adaptor, NINL, has evolved under positive selection**

110 Active dynein complexes in human cells are large, multi-subunit machines. The dynein/dynactin  
111 complex is composed of two copies of the ATPase-containing heavy chain, two copies of five  
112 additional dynein chains, the 23-subunit dynactin complex, and an activating adaptor (Olenick  
113 and Holzbaur, 2019; Reck-Peterson et al., 2018) (Figure 1A). To generate hypotheses about  
114 potential conflicts between the dynein machinery and pathogens, we searched for signatures of  
115 positive selection during primate evolution in genes for all dynein/dynactin subunits and the 13  
116 activating adaptors known at the time of this analysis. Each human dynein gene was compared  
117 to orthologs in 13-20 diverse simian primates, and a gene-wide dN/dS (also known as omega)  
118 value was calculated, which compares the gene-wide rate of nonsynonymous changes (*i.e.*,  
119 amino acid altering) to the rate of synonymous (*i.e.*, silent) changes. Consistent with the critical  
120 role of dynein-mediated intracellular transport, most genes we analyzed were extremely well  
121 conserved with dN/dS values of  $<0.1$ , while one dynein activating adaptor, NINL, showed an  
122 elevated rate compared to the rest (Figure 1B and Supplementary File 1). To determine whether  
123 any genes had individual codons that have been subject to recurrent positive selection, we  
124 performed codon-based analyses of positive selection. Consistent with their low dN/dS values,  
125 we observed that most dynein, dynactin and activating adaptor genes showed no evidence for  
126 positive selection ( $p$ -value  $> 0.05$ ). In contrast, NINL showed strong evidence for recurrent positive

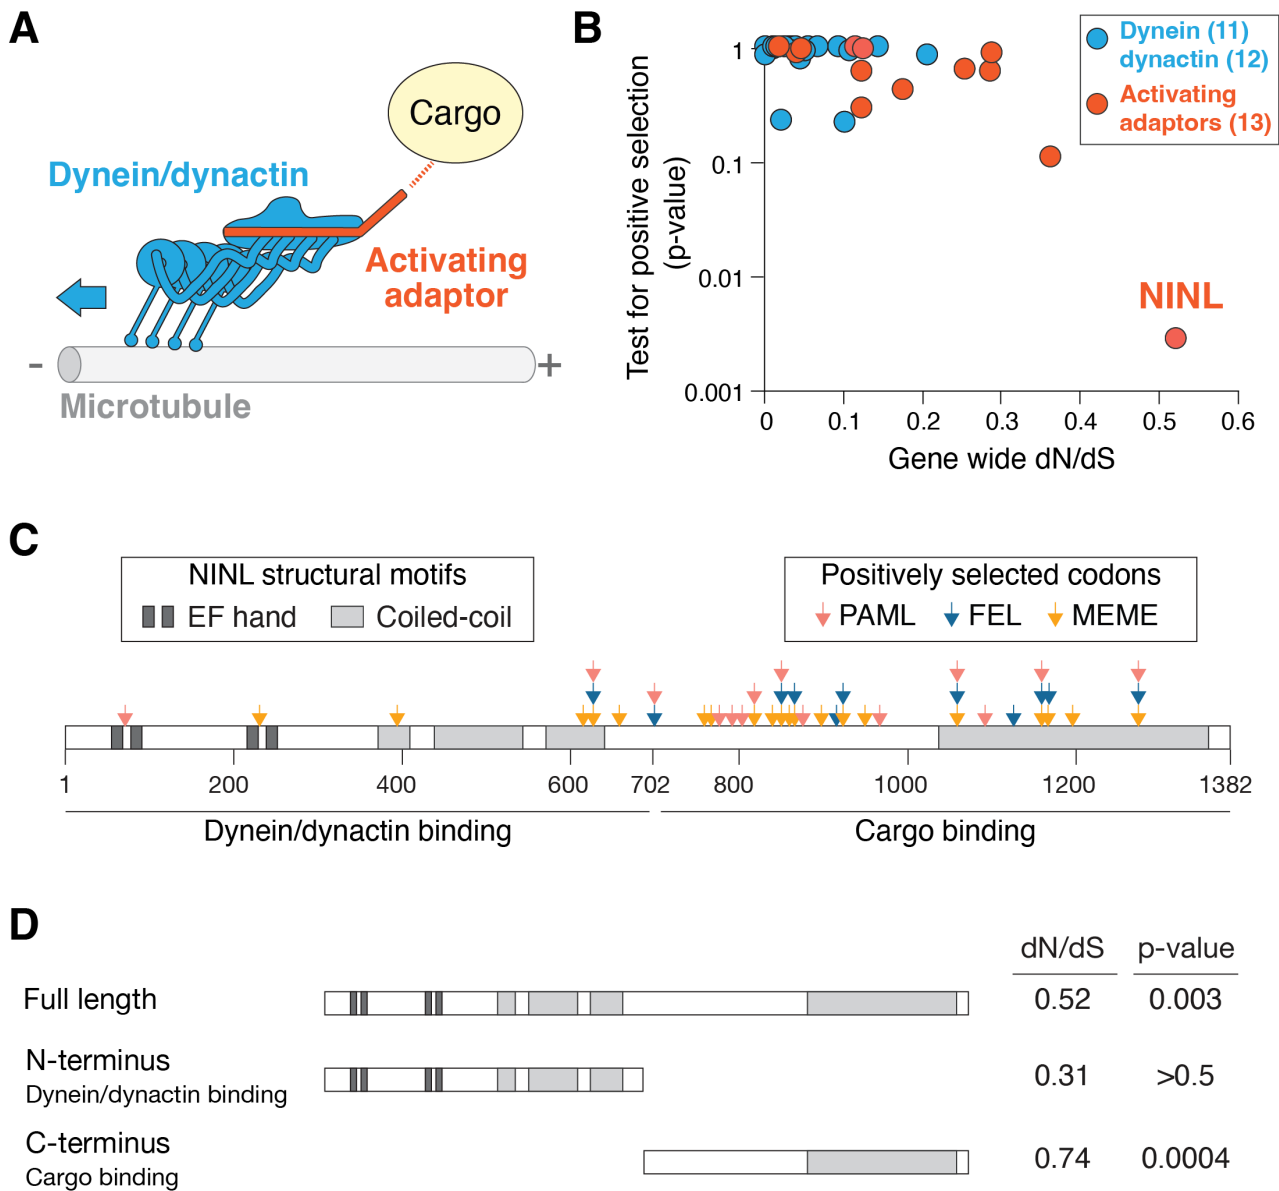

**Figure 1. The dynein activating adaptor, NINL, has evolved under positive selection in primates.** (A) A schematic of the cytoplasmic dynein-1 transport machinery, which includes dynein and dynactin subunits (blue) and an activating adaptor (orange). Dynein moves toward the minus end of microtubules (blue arrow). (B) A scatterplot displaying evolutionary signatures of selection for 23 dynein and dynactin genes (blue) and 13 dynein activating adaptor genes (orange). The x-axis displays the rate of non-synonymous changes (dN) divided by the rate of synonymous changes (dS) in the coding sequence across primate evolution. The y-axis displays the calculated probability of the gene having evolved under positive selection using PAML. Complete data are found in Figure 1–figure supplement 1. (C) A schematic of human NINL isoform 1 with EF hand (dark grey) and coiled-coil (light grey) domains shown. The amino-terminal dynein/dynactin binding region and the carboxy-terminal candidate cargo binding domains are indicated. Sites of positive selection predicted by three evolutionary models are shown as colored arrows: PAML (light red), FEL (blue), MEME (orange). A full list of sites and their calculated probabilities are shown in Figure 1–figure supplement 2. (D) Full-length NINL, the dynein/dynactin binding amino-terminus of NINL and the candidate cargo binding carboxy-terminus of NINL were analyzed for signatures of positive selection. Select dN/dS and p-values are shown, with additional evolutionary data in Figure 1–figure supplement 3.

*(Line-numbered figure legends are also found at the end of the document).*

127 selection in primates, consistent with previous data (Gordon et al., 2020) (Figure 1B and  
128 Supplementary File 1), establishing the possibility that NINL could be at the interface of a host-  
129 pathogen interaction.

130  
131 In order to attribute the signatures of positive selection in NINL to known functional domains within  
132 NINL, we performed additional analyses to identify specific codons that have evolved under  
133 positive selection using three independent methods, PAML, FEL, and MEME (Kosakovsky Pond  
134 and Frost, 2005; Murrell et al., 2012; Yang, 2007). We identified 30 codons that show signatures  
135 of positive selection based on one or more of these methods (Figure 1C and Supplementary File  
136 2). Most (24 of 30) of these codons are excluded from the known dynein/dynactin binding region  
137 of NINL (residues 1-702) (Redwine et al., 2017) and instead are located in the carboxy-terminal  
138 region of the protein that is expected to interact with cargo (residues 703-1382). When we  
139 analyzed individual domains on their own, we found no evidence for positive selection in the  
140 amino-terminus alone, while the carboxy-terminus retained a significant signature of positive  
141 selection (Figure 1D and Supplementary File 3). Taken together, our evolutionary analyses  
142 indicate that NINL stands out among components of the active dynein complex by having evolved  
143 under recurrent positive selection in primates.

144

#### 145 **Viral replication is increased in cells lacking NINL**

146 Our observation that NINL displays a signature of positive selection that is unique among dynein  
147 components led us to hypothesize that NINL may be co-opted by viruses for viral replication or  
148 may play a role in the immune response to viruses. To evaluate this hypothesis, we generated a  
149 human A549 cell line that lacked NINL (NINL KO) (Figure 2A, Figure 2–figure supplement 1A, B).  
150 At a qualitative level, these cells appeared to have a normal microtubule architecture and  
151 centrosomes (Figure 2–figure supplement 1A). In parallel, we generated cells that lacked ninein  
152 (NIN KO) (Figure 2A, Figure 2–figure supplement 1C), the closest human paralog to NINL, which

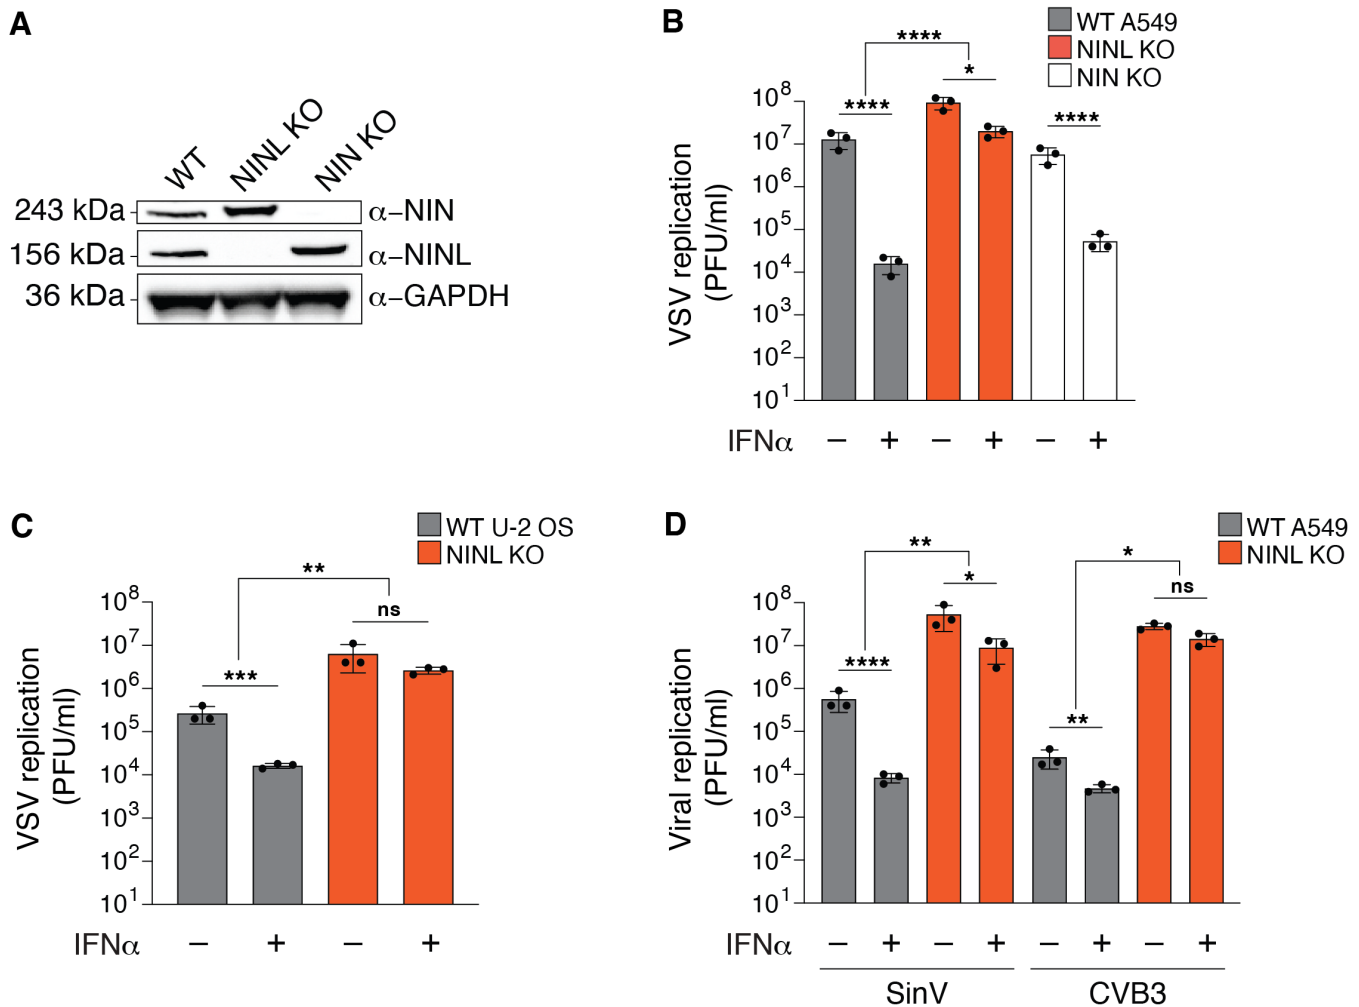

**Figure 2. The antiviral potency of IFN $\alpha$  is reduced in NINL KO cells.** (A) Immunoblots of WT A549 cells, and CRISPR/Cas9-generated NINL and NIN KO A549 cells probed with the indicated antibodies. GAPDH served as a loading control. Protein molecular weight markers are shown in kilodaltons (kDa) to the left of each immunoblot. Representative images from three biological replicates are shown. (B) WT, NINL KO, and NIN KO A549 cells were treated with 100U IFN $\alpha$  for 24 hours and then infected with VSV (5000 PFU/mL, MOI  $\approx$  0.01). Virus-containing supernatants were collected nine hours post-infection and viral titers (y-axis, plaque forming units per mL) were determined by plaque assay. (C) WT or NINL KO U-2 OS cells were treated with 100U IFN $\alpha$  for 24 hours and then infected with VSV (5000 PFU/mL, MOI  $\approx$  0.01). Virus-containing supernatant was collected nine hours post-infection and viral titers (y-axis, plaque forming units per mL) were determined by plaque assay. (D) WT or NINL KO A549 cells were treated with 100U IFN $\alpha$  for 24 hours and then infected with Sindbis virus (500,000 PFU/mL, MOI  $\approx$  1.0) (left) or treated with 1000U IFN $\alpha$  for 24 hours and then infected with coxsackievirus B3 (5000 PFU/mL, MOI  $\approx$  0.01) (right). Virus-containing supernatants were collected 24 hours post-infection and viral titers (y-axis, plaque forming units per mL) were determined by plaque assay. (B-D) Data are presented as mean  $\pm$  standard deviation of three biological replicates, with individual points shown. Data were analyzed by two-way ANOVA with Tukey's method adjustment for multiple comparisons for IFN $\alpha$  treatment within each cell line, two-way ANOVA interaction comparison for IFN $\alpha$  interaction between cell lines. \* $p$ <0.05, \*\* $p$ <0.01, \*\*\* $p$ <0.001, \*\*\*\* $p$ <0.0001, ns = not significant.



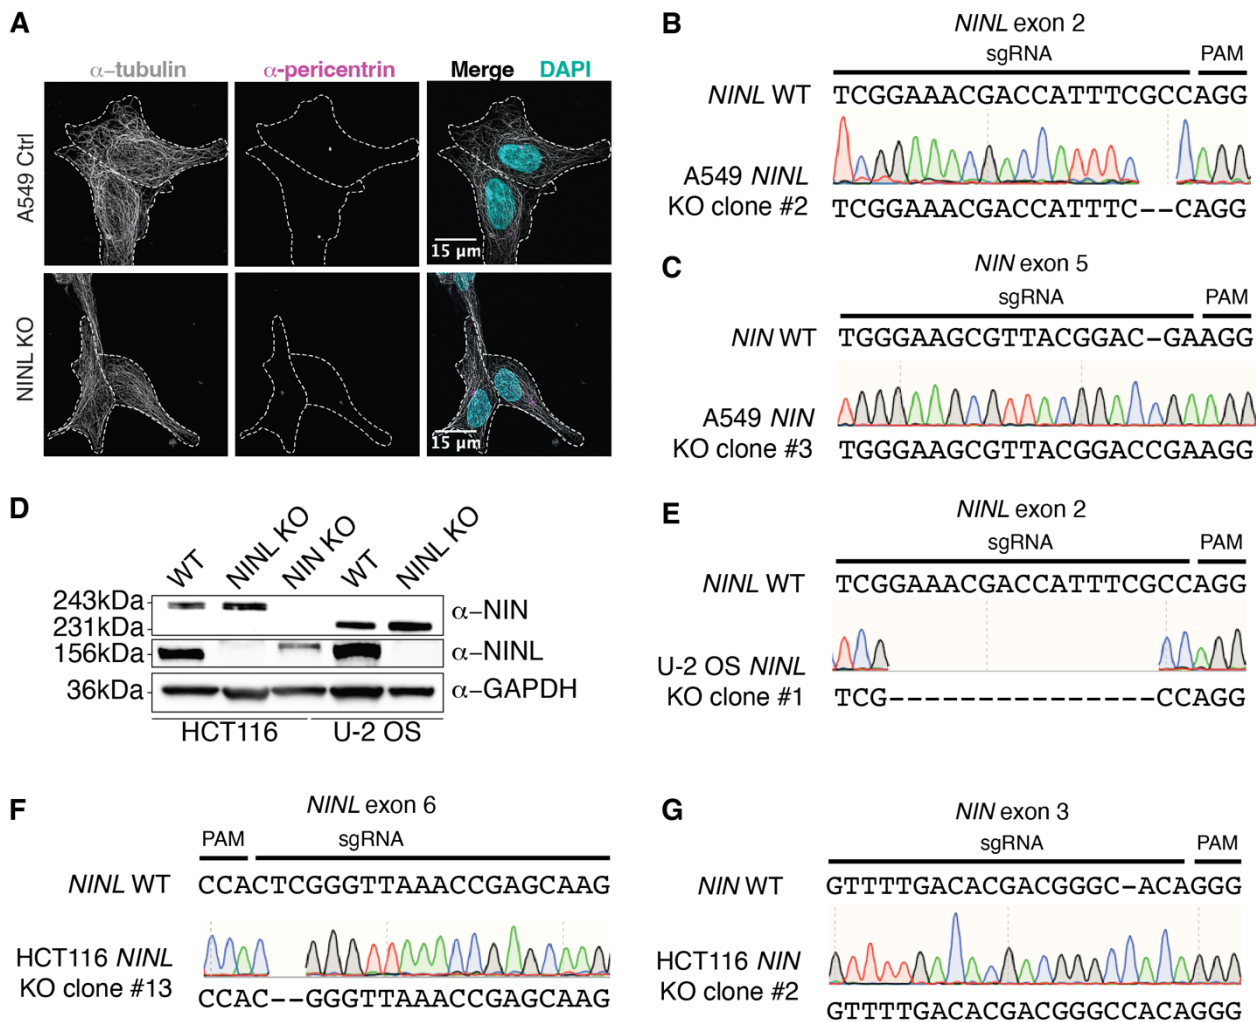

**Figure 2–figure supplement 1. Validation of CRISPR/Cas9-editing to generate NINL and NIN KO cells.** (A) Confocal micrographs displayed as maximum intensity projections of WT and NINL KO A549 cells. Immunostaining with anti-pericentrin and anti-tubulin antibodies was used to visualize centrosomes and microtubules, respectively. Nuclei were visualized with DAPI. 15  $\mu$ m scale bars are shown in the merged micrographs. Dashed white lines denote cellular boundaries. Representative micrographs from two biological replicates are shown. (B) Sequence verification of exon 2-targeted NINL KO A549 cells. An excerpt of the WT *NINL* sequence is shown with the CRISPR-targeting sgRNA and PAM sequences indicated (top), the sequencing chromatogram (middle), and the sequence of the NINL KO (bottom). (C) Sequence verification of exon 5-targeted NIN KO A549 cells. (D) Immunoblots of control (CTRL) HCT116 and U-2 OS cells, and CRISPR/Cas9-generated NINL and NIN KO HCT116 and U-2 OS cells probed with the indicated antibodies. GAPDH served as a loading control. Protein molecular weight markers are shown in kilodaltons (kDa) to the left of each immunoblot. Representative images from three biological replicates are shown. (E) Sequence verification of exon 2-targeted NINL KO U-2 OS cells. (F) Sequence verification of exon 6-targeted NINL KO HCT116 cells. (G) Sequence verification of exon 3-targeted NIN KO HCT116 cells.

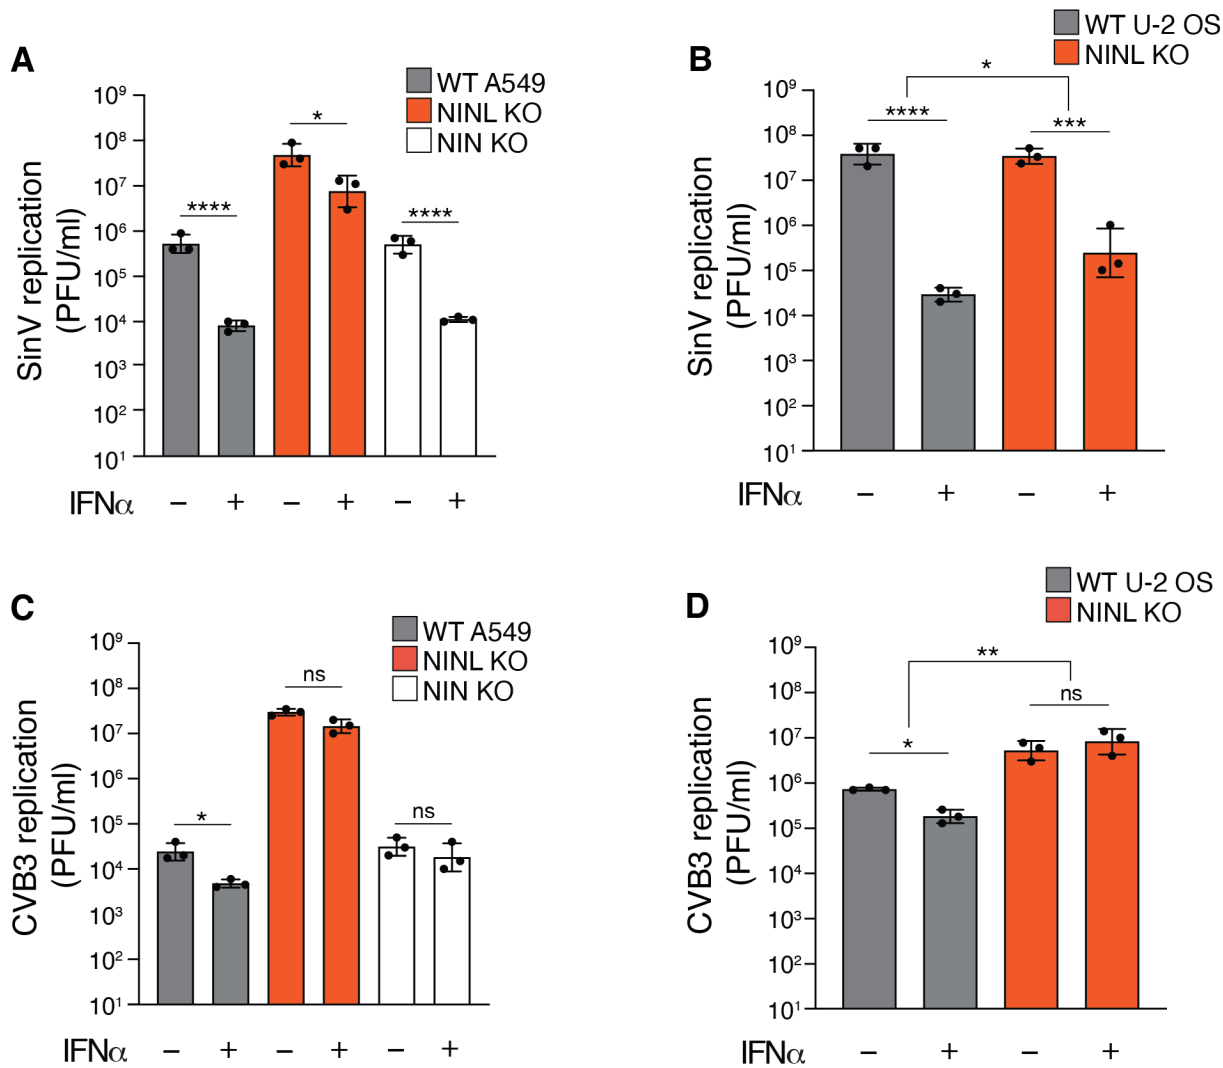

**Figure 2–figure supplement 2. Reduction of IFN $\alpha$ -mediated antiviral response is observed across multiple cell lines.** (A) A549 WT, NINL KO, or NIN KO cells were treated with 100U IFN $\alpha$  for 24 hours, then infected with Sindbis virus (500,000 PFU/mL, MOI  $\approx$  1.0). Cells were collected 24 hours post-infection and viral titers (y-axis, plaque forming units per mL) were determined by plaque assay. WT and NINL KO data are reproduced from Figure 2D for comparison. (B) U-2 OS WT or NINL KO cells were treated, infected, harvested, and quantified as described in (A). (C) A549 WT, NINL KO, or NIN KO cells were treated with 1000U IFN $\alpha$  for 24 hours, then infected with coxsackievirus B3 (5,000 PFU/mL, MOI  $\approx$  0.01). Cells were collected 24 hours post-infection and viral titers (y-axis, plaque forming units per mL) were determined by plaque assay. WT and NINL KO data are reproduced from Figure 2D for comparison. (D) U-2 OS WT or NINL KO cells treated, infected, harvested, and quantified as described in (C). (A-D) Data are presented as mean  $\pm$  standard deviation of three biological replicates, with individual points shown. Data were analyzed by two-way ANOVA with Tukey's method adjustment for multiple comparisons for IFN $\alpha$  treatment within each cell line, two-way ANOVA interaction comparison for IFN $\alpha$  interaction between cell lines. \*p<0.05, \*\*p<0.01, \*\*\*p<0.001, \*\*\*\*p<0.0001, ns = not significant.

153 shares a similar domain architecture with NINL and is also a dynein activator adaptor (Redwine  
154 et al., 2017), but shows no evidence for positive selection (Figure 1B and Supplementary File 1).  
155 To evaluate the effect that NINL or NIN have on viral replication or the innate immune response  
156 to viral infection, we infected WT, NINL KO, or NIN KO A549 cells with a model enveloped  
157 negative-sense single-stranded RNA (-ssRNA) virus, vesicular stomatitis virus (VSV), with and  
158 without pretreatment with the antiviral signaling cytokine interferon alpha (IFN $\alpha$ ). Consistent with  
159 the strong antiviral effect of IFN $\alpha$ , we observed a >100-fold decrease in viral replication in WT  
160 and NIN cells that had been pretreated with IFN $\alpha$  (Figure 2B). In contrast, we observed that the  
161 effect of IFN $\alpha$  was significantly attenuated in NINL KO cells, where we found that IFN $\alpha$   
162 pretreatment reduced VSV replication <10-fold (Figure 2B). To attribute the changes in viral  
163 replication to the absence of NINL rather than off-target perturbations or cell-line specific effects,  
164 we generated additional NINL KO cell lines in human U-2 OS cells (Figure 2–figure supplement  
165 1D, E). We again observed that NINL KO cells had a significant reduction in the antiviral effects  
166 of IFN $\alpha$  pretreatment (Figure 2C). We also noted that VSV replication was higher in NINL KO cell  
167 lines compared to WT even in the absence of IFN, which may indicate either a basal defect in the  
168 antiviral response in NINL KO cells or a second function of NINL that is IFN independent. To test  
169 whether the NINL-dependent effect on IFN antiviral potency was specific to VSV replication, we  
170 tested two positive-sense single-stranded RNA (+ssRNA) viruses: Sindbis virus (SinV)– an  
171 enveloped virus, and coxsackievirus B3 (CVB3)– a non-enveloped virus in both A549 and U-2  
172 OS cells. In both cases, we observed a potent antiviral effect of IFN $\alpha$  pretreatment in WT and  
173 NIN KO cells, while this effect was reduced in NINL KO cells (Figure 2D, Figure 2–figure  
174 supplement 2A-D). The attenuation of the IFN-induced antiviral effect against viruses from three  
175 distinct families suggests that NINL may broadly play a role in the IFN-mediated innate immune  
176 response to viruses.  
177

178 **Loss of NINL results in an attenuated antiviral immune response**

179 Based on the reduced antiviral potency of IFN $\alpha$  in cells lacking NINL, we next investigated  
180 whether there was an attenuation of IFN-mediated signaling in NINL KO cells. Type I IFNs, such  
181 as IFN $\alpha$ , activate the Janus kinase/signal transducer and activator of transcription (JAK/STAT)  
182 pathway to trigger the expression of IFN-stimulated genes (ISGs), which include potent antiviral  
183 effectors (Schoggins, 2019). Therefore, we asked whether there was a defect in the JAK/STAT  
184 signaling cascade by western blot analysis of the phosphorylation of the transcription factors  
185 STAT1 (pSTAT1(Y701)) and STAT2 (pSTAT2(Y690)) as well as the induction of ISG expression  
186 following IFN $\alpha$  pretreatment. Despite robust phosphorylation of STAT1 and STAT2 in response  
187 to IFN $\alpha$  pretreatment in WT, NINL KO, and NIN KO cells, protein expression of the canonical  
188 ISGs—MX1, IFIT3, OAS1, and ISG15 was greatly reduced in NINL KO cells relative to WT or NIN  
189 KO cells (Figure 3A). To again confirm that this was not specific to cell type, we showed that this  
190 lack of ISG protein expression was independent of cell background or the choice of CRISPR guide  
191 (Figure 2—figure supplement 1A-G, Figure 3—figure supplement 1). Next, we performed RNAseq  
192 analyses on WT, NINL KO, and NIN KO A549 cells in the presence or absence of IFN $\alpha$   
193 pretreatment (Supplementary File 4). In WT cells, we identified 88 ISGs that were significantly  
194 (adjusted p-value  $\leq 0.05$ , log<sub>2</sub>fold change  $\geq 1$ ) upregulated in response to IFN treatment (Figure  
195 3—figure supplement 2). We then compared the transcriptional profiles of these ISGs between  
196 IFN $\alpha$ -treated WT, NINL KO, and NIN KO cells. Consistent with our western blot analysis, the  
197 induction pattern of ISG transcripts in WT and NIN KO cells was similar, whereas many ISG  
198 transcripts from IFN $\alpha$  treated NINL KO cells were downregulated compared to IFN $\alpha$  treated WT  
199 cells (Figure 3B, Figure 3—figure supplement 3 and Figure 3—figure supplement 4). Other  
200 transcripts unrelated to the IFN response also showed altered expression in NINL KO cells  
201 relative to WT cells (Figure 3—figure supplement 4 and Supplementary File 4). However, the  
202 overall lower expression of ISGs in NINL KO relative to WT cells (Figure 3-figure supplement 4)

203

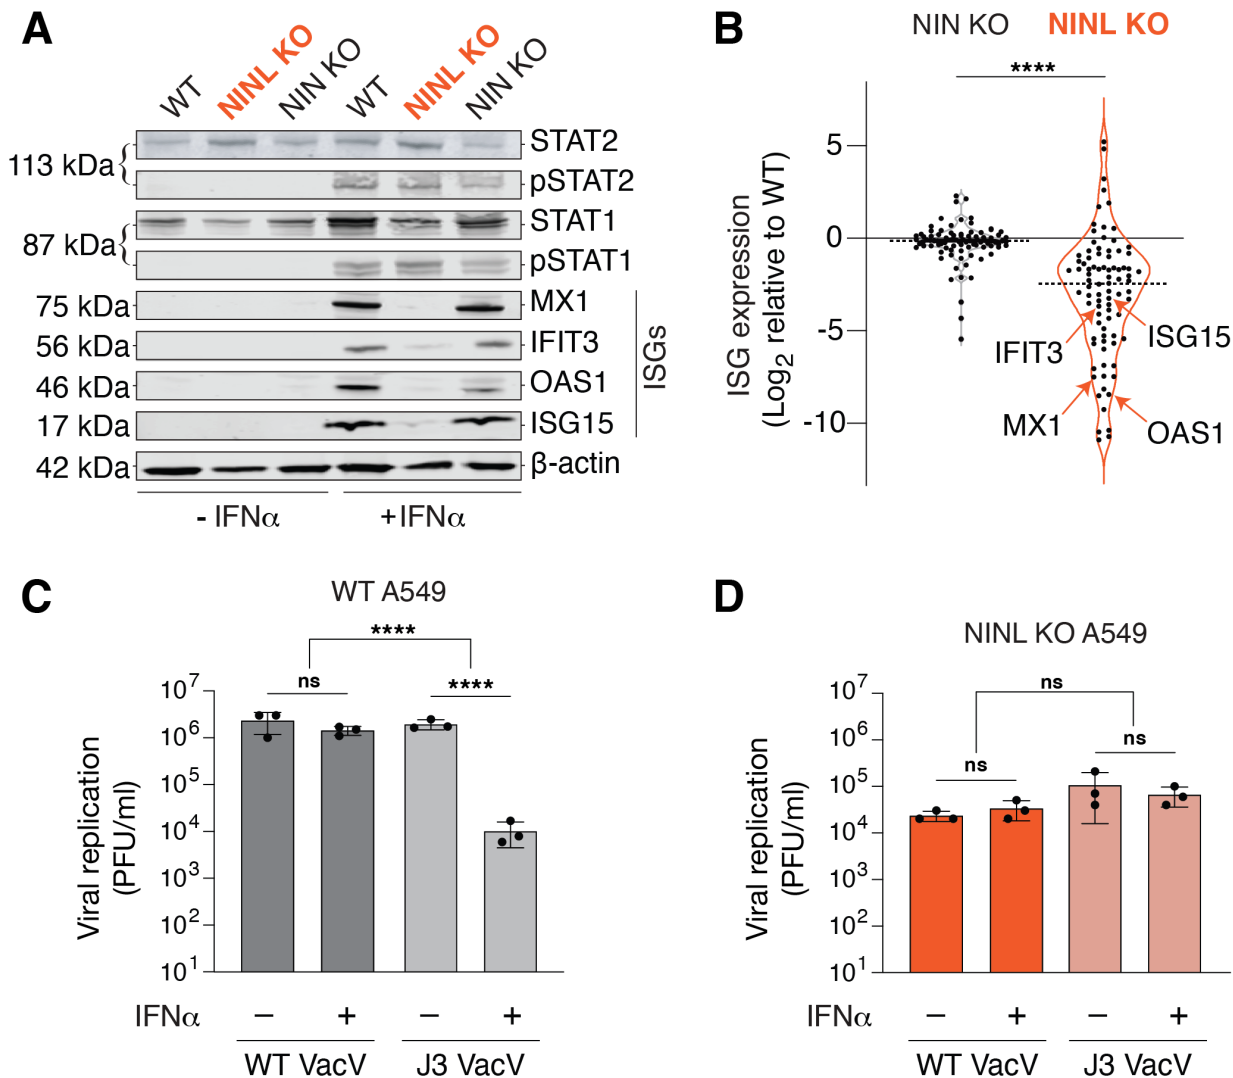

**Figure 3. NINL KO cells fail to mount an effective IFN response.** (A) Immunoblot of extracts from WT, NINL KO, and NIN KO A549 cells untreated (-) or treated (+) with IFN $\alpha$ . Immunoblots were probed with anti-STAT2, anti-Phospho-STAT2 (Tyr690), anti-STAT1, anti-Phospho-STAT1 (Tyr701), anti-Mx1, anti-IFIT3, anti-OAS1, anti-ISG15, and anti- $\beta$ -actin antibodies. Predicted protein molecular weights are shown in kilodaltons (kDa) to the left of each immunoblot. Representative images from three biological replicates are shown. (B) Differential ISG expression in WT, NINL KO, and NIN KO cells induced with IFN $\alpha$ . ISGs were identified as the 88 genes whose expression was upregulated in WT cells after IFN $\alpha$  pretreatment (Figure 3-figure supplement 2). Experiments were performed with three biological replicates. Data are displayed as a violin plot of ISG expression in NIN KO or NINL KO cells relative to WT cells. \*\*\*\* =  $p < 0.0001$  based on paired t-test. Dotted line indicates mean. Individual data points for ISGs shown in panel (A) are indicated. (C) A549 WT cells were treated with 1000U IFN $\alpha$  for 24 hours, then infected with wild-type vaccinia virus (WT VacV) or J3 mutant vaccinia virus (J3 VacV) (50,000 PFU/mL, MOI  $\approx$  0.1). Cell-associated virus was collected 24 hours post-infection and viral titers (y-axis, plaque forming units per mL) were determined by plaque assay. (D) A549 NINL KO cells were treated, infected, harvested, and quantified as described in (C). (C-D) Data are presented as mean  $\pm$  standard deviation of three biological replicates, with individual points shown. Data were analyzed by two-way ANOVA with Tukey's method adjustment for multiple comparisons for IFN $\alpha$  treatment within each cell line, two-way ANOVA interaction comparison for IFN $\alpha$  interaction between cell lines. \*\*\*\* $p < 0.0001$ , ns = not significant.

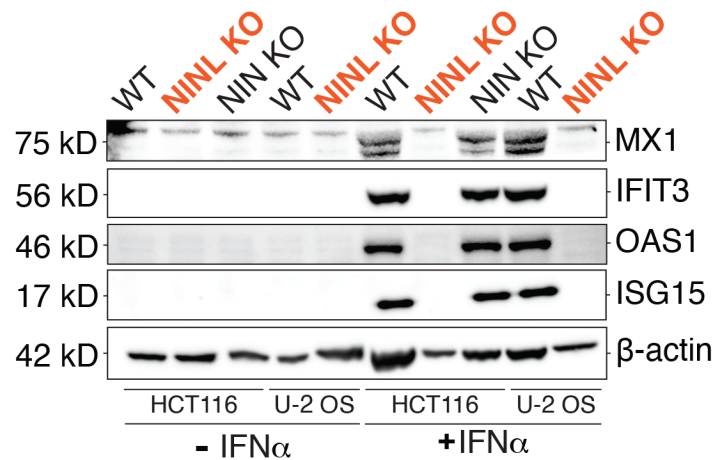

**Figure 3–figure supplement 1. Reduced ISG production occurs following NINL KO in multiple cell lines generated using different CRISPR gRNAs** Immunoblot of extracts from WT, NINL KO, NIN KO HCT116 cells and WT and NINL KO U-2 OS cells untreated or treated with IFN $\alpha$ . Immunoblots were probed with anti-STAT2, anti-Phospho-STAT2 (Tyr690), anti-STAT1, anti-Phospho-STAT1 (Tyr701), anti-Mx1, anti-IFIT3, anti-OAS1, anti-ISG15, and anti- $\beta$ -actin antibodies. Predicted protein molecular weights are shown in kilodaltons (kDa) to the left of each immunoblot. Representative images from three biological replicates are shown.

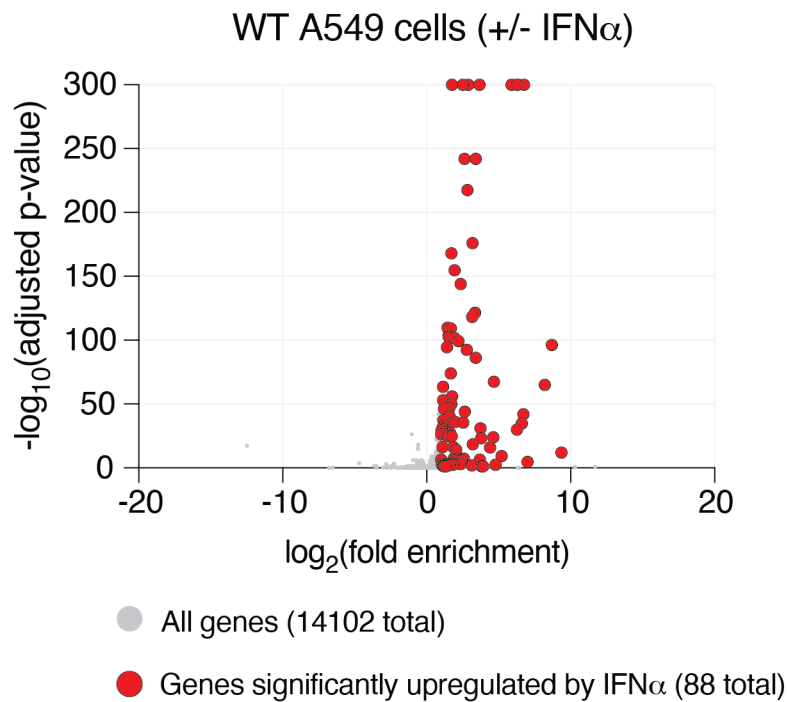

**Figure 3–figure supplement 2. Identification of 88 ISGs in WT A549 cells.** Differential gene expression from RNAseq analyses of WT A549 cells pretreated with IFN $\alpha$  compared to untreated. Each condition (untreated or IFN $\alpha$ ) was performed with three biological replicates, with independent RNA extractions, sequencing library preparation, and sequencing. RNA levels for a total of 14102 genes (grey dots) could be compared (see Materials and Methods and Supplementary File 4). Only 88 genes (red dots) showed a statistically significant upregulation (adjusted p-value  $\leq 0.05$ , log<sub>2</sub>-fold change  $\geq 1$ ), which we refer to in subsequent analyses as ISGs.

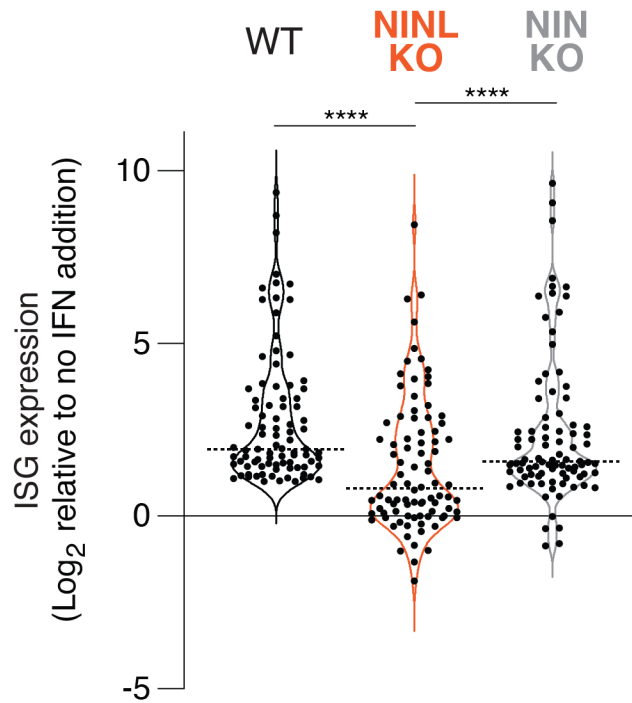

**Figure 3–figure supplement 3. Interferon induction has a reduced effect on ISG expression in NINL KO cells.** Differential gene expression of 88 ISGs (identified in Figure 3–figure supplement 2) from RNAseq analyses of the indicated cell lines pretreated with IFN $\alpha$  compared to untreated. Each condition (untreated or IFN $\alpha$ ) was performed with three biological replicates, with independent RNA extractions, sequencing library preparation, and sequencing. Only the 88 genes significantly upregulated in WT cells, which we refer to as ISGs (adjusted p-value  $\leq 0.05$ , log<sub>2</sub>-fold change  $\geq 1$ ), are shown for each cell line. Data are displayed as a violin plot of ISG upregulation, with the dotted line indicating the mean. \*\*\*\*p<0.0001 based on one-way ANOVA test.



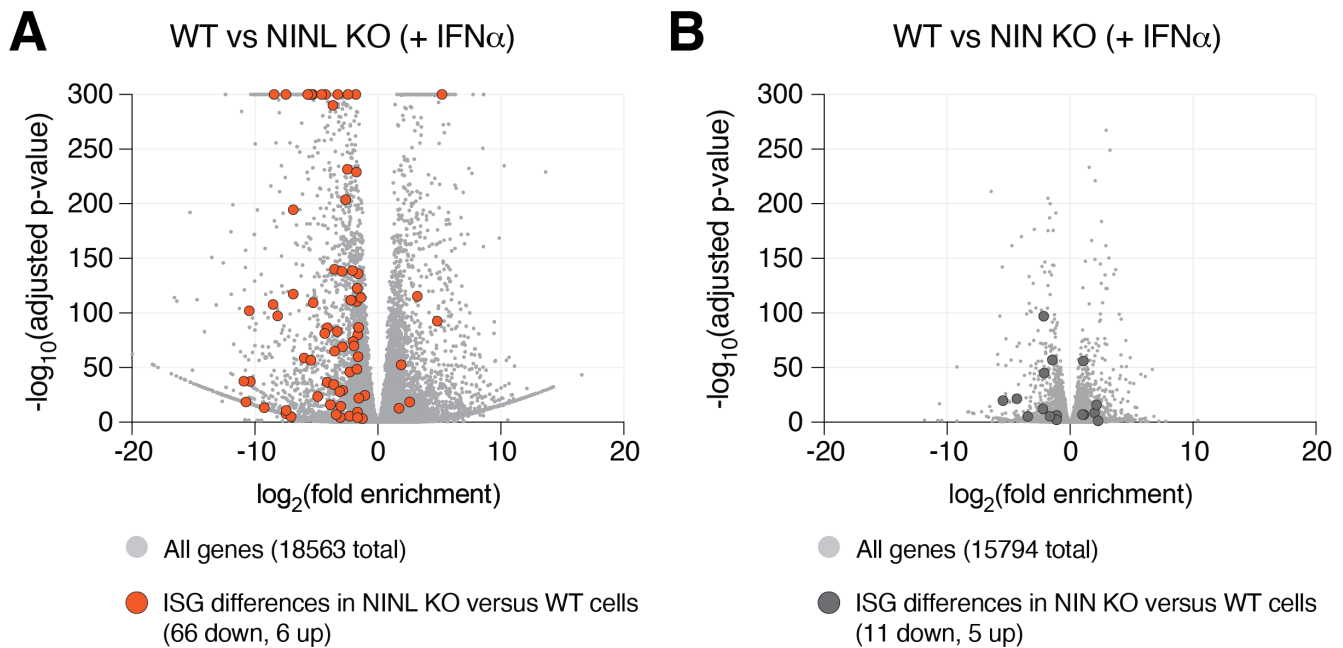

**Figure 3–figure supplement 4. Differential gene expression in NINL KO and NIN KO cells compared to WT cells.** (A) Differential gene expression from RNAseq analyses of NINL KO cells treated with IFN $\alpha$  compared to WT A549 cells treated with IFN $\alpha$ . Each cell line (NINL KO or WT) was treated with IFN $\alpha$  with three biological replicates, with independent RNA extractions, sequencing library preparation, and sequencing. RNA levels for a total of 18563 genes (grey dots) could be compared (see Materials and Methods and Supplementary File 4). Orange dots highlight the 72 ISGs that are significantly differentially expressed between cell lines, with the majority (66 of 72) of ISGs significantly lower in NINL KO cells (adjusted p-value  $\leq 0.05$ ,  $\log_2$ -fold change  $\leq -1$ ). (B) Differential gene expression from RNAseq analyses of NIN KO cells treated with IFN $\alpha$  compared to WT A549 cells treated with IFN $\alpha$ . RNA levels for a total of 15794 genes (grey dots) could be compared (see Materials and Methods and Supplementary File 4). Dark grey dots highlight the 11 ISGs that are significantly differentially expressed between cell lines. (C) Reactome pathway analysis (Jassal et al., 2020) of the 3549 genes with significantly lower expression (adjusted p-value  $\leq 0.05$ ,  $\log_2$ -fold change  $\leq -1$ ) in NINL KO cells treated with IFN $\alpha$  relative to WT cells treated with IFN $\alpha$ . Only the two pathways shown were identified as significantly different between the cell lines. The number of genes found to be lower in NINL KO cells (# entities found) compared to the number of genes in the indicated pathway (# entities total) is shown. The p-value, as well as false discovery rate (FDR) adjusted p-values are shown.

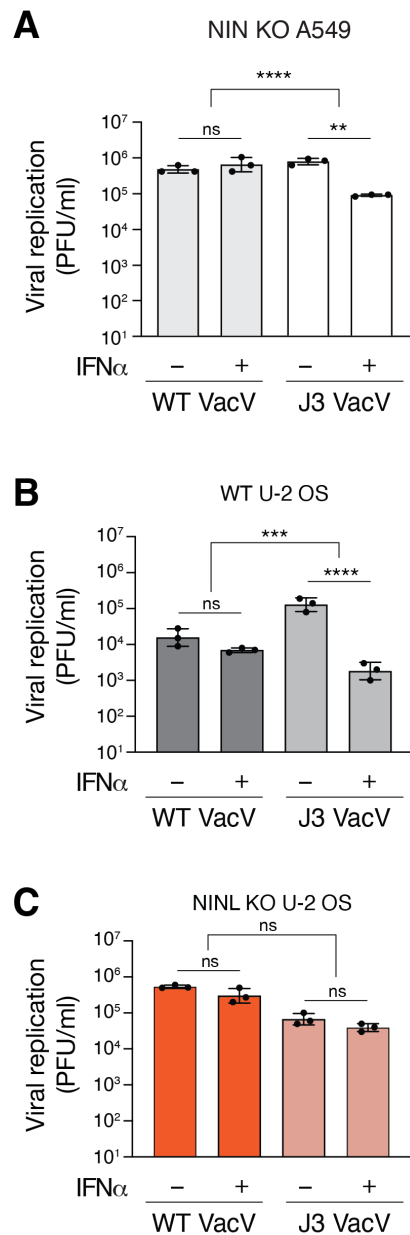

**Figure 3–figure supplement 5. NINL KO results in loss of interferon sensitivity of the VacV J3 mutant.**

(A) A549 NIN KO cells were treated with 1000U IFN $\alpha$  for 24 hours, then infected with wildtype vaccinia virus (VacV WT) or J3 mutant vaccinia virus (J3 VacV) (50,000 PFU/mL, MOI  $\approx$  0.1). Cell-associated virus was collected 24 hours post-infection and viral titers (y-axis, plaque forming units per mL) were determined by plaque assay. (B) U-2 OS WT cells were treated with 1000U IFN $\alpha$  for 24 hours, then infected with wild-type vaccinia virus or J3 mutant vaccinia virus (50,000 PFU/mL, MOI  $\approx$  0.1). Cells were collected 24 hours post-infection and viral titers (y-axis, plaque forming units per mL) were determined by plaque assay. (C) U-2 OS NINL KO cells were treated, infected, harvested, and collected as indicated in (B). (A-C) Data are presented as mean  $\pm$  standard deviation of three biological replicates, with individual points shown. Data were analyzed by two-way ANOVA with Tukey's method adjustment for multiple comparisons for IFN $\alpha$  treatment within each viral infection, two-way ANOVA interaction comparison for IFN $\alpha$  interaction between viral infections. \*\*p<0.01, \*\*\* p<0.001, ns = not significant.

204 indicates that cells lacking NINL have a distinct defect in their ability to mount an effective antiviral  
205 immune response.

206

207 To further demonstrate that the lack of ISG expression in cells lacking NINL has a profound effect  
208 on the interferon-mediated antiviral response, we took advantage of a virus in which interferon  
209 sensitivity can be modulated genetically. Vaccinia virus (VacV) is a large double-stranded DNA  
210 virus that is relatively insensitive to the effects of IFN $\alpha$  due to the large number of proteins the  
211 virus encodes that antagonize the immune response (Yu et al., 2021). However, a point mutation  
212 in the J3 methyltransferase protein (VacV J3) confers interferon sensitivity by sensitizing the virus  
213 to the antiviral effects of the IFIT family of ISGs (Daffis et al., 2010; Daugherty et al., 2016;  
214 Johnson et al., 2018; Latner et al., 2002). As IFIT1, IFIT2, and IFIT3 were among the ISGs we  
215 saw decreased in NINL KO cells relative to WT and NIN KO cells (Supplementary File 4), we  
216 hypothesized that NINL KO cells may lack the ability to inhibit the J3 mutant vaccinia virus after  
217 IFN $\alpha$  pretreatment. As expected, in WT and NIN KO A549 cells, wildtype VacV (VacV WT) was  
218 insensitive to IFN $\alpha$ , whereas VacV J3 replication was significantly reduced upon IFN $\alpha$   
219 pretreatment (Figure 3C, Figure 3–figure supplement 5A). In contrast, mutant and wildtype viruses  
220 replicated equivalently in the NINL KO cells regardless of IFN $\alpha$  pretreatment (Figure 3D). We  
221 found the same differential response to the J3 VacV mutant between WT and NINL KO cells in  
222 U-2 OS cells, showing that this phenotype is not cell type specific (Figure 3–figure supplement 5).  
223 All together, these data suggest NINL plays a critical role during the IFN-mediated antiviral  
224 immune response, further substantiating our hypothesis that NINL is at the center of an  
225 antagonistic host-pathogen interaction.

226

### 227 **Viral proteases cleave NINL in a host-specific manner**

228 The IFN response is the first line of host antiviral defense during viral infection. Thus, viruses have  
229 developed many strategies to evade or subvert the host IFN response (Beachboard and Horner,

230 2016; Hoffmann et al., 2015). Our data indicating that NINL is important for the IFN response,  
231 combined with the observation that NINL is evolving under positive selection, led us to  
232 hypothesize that viruses may antagonize NINL function. One such viral antagonism strategy is to  
233 deploy virus-encoded proteases to cleave components of the host antiviral defense system (Lei  
234 and Hilgenfeld, 2017; Tsu et al., 2021b). Thus, we next investigated whether viral proteases  
235 cleave NINL. Using a predictive model of enteroviral 3C protease (3C<sup>pro</sup>) target specificity (Tsu et  
236 al., 2021a), we identified three high-confidence sites of potential cleavage within NINL at residues  
237 231, 827, and 1032 (Figure 4A) in which amino acid diversity within primates is expected to alter  
238 3C<sup>pro</sup> cleavage susceptibility (Figure 4B). Indeed, upon transfection of cells with NINL and CVB3  
239 3C<sup>pro</sup>, we observed an overall reduction of full-length NINL and the appearance of two cleavage  
240 products at sizes that correspond to predicted cleavage at sites 827 and 1032 (Figure 4C, D). We  
241 also observed a weaker product at a size that corresponds to the predicted size of NINL after  
242 cleavage at site 231. To confirm cleavage site specificity, we generated NINL point mutants that  
243 take advantage of the diversity of these sites found in primates (Figure 4B). Specifically, we  
244 replaced the glutamine immediately preceding the site of cleavage (the P1 position) with an  
245 arginine found in non-human primates that we predicted would prevent cleavage by 3C<sup>pro</sup>s (Tsu  
246 et al., 2021a) for each of the predicted sites. Co-transfection of CVB3 3C<sup>pro</sup> with NINL containing  
247 these mutations individually (Q1032R) or in combination (double mutant Q827R/Q1032R  
248 (Double) and triple mutant Q231R/Q827R/Q1032R (Triple)) confirmed the sites of cleavage, with  
249 the NINL triple mutant eliminating all cleavage products by CVB3 3C<sup>pro</sup> (Figure 4D). We also noted  
250 that two of these sites (Q827 and Q1032), along with many of the codons predicted to be evolving  
251 under positive selection (Figure 1C), reside in a single exon (exon 17) within the carboxy-terminal  
252 region of NINL (Figure 4A). Intriguingly, this exon is lacking in an alternatively spliced isoform of  
253 NINL (isoform 2) (Dona et al., 2015; Kersten et al., 2012; van Wijk et al., 2009). We, therefore,  
254 tested whether isoform 2 is cleaved by CVB3 3C<sup>pro</sup>. Consistent with the loss of two primary sites  
255 of cleavage, we observed minimal decrease in the full-length product when isoform 2 was co-

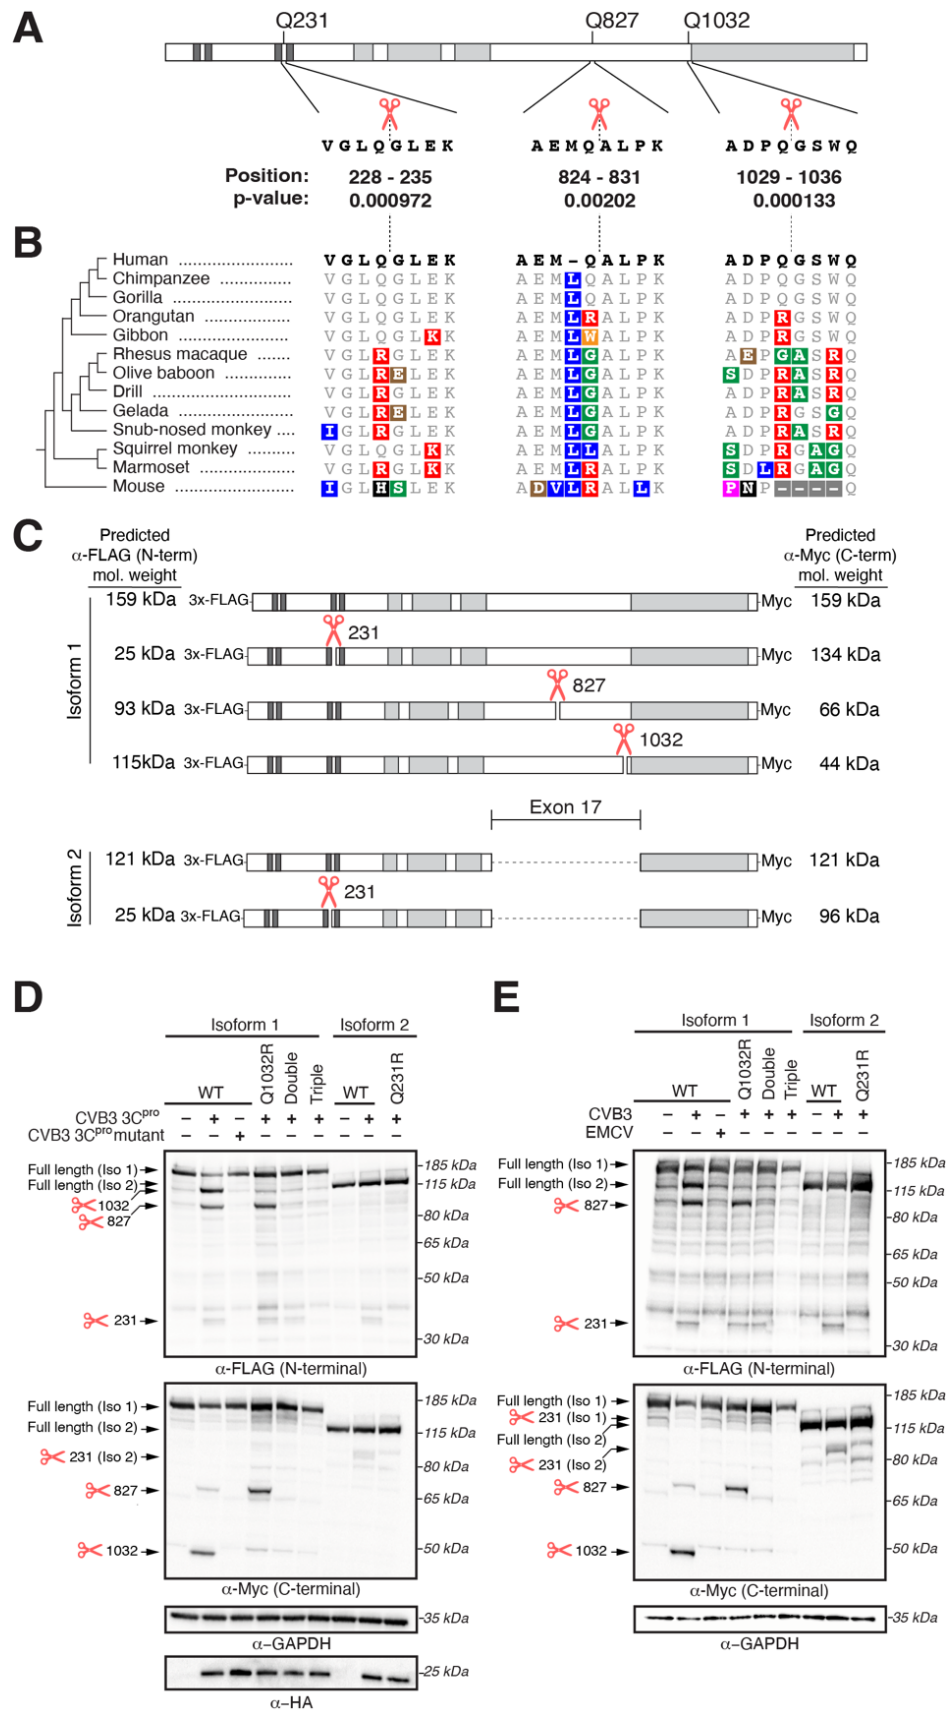

**Figure 4. NINL is cleaved at species-specific sites by virally encoded proteases. (A)** Schematic of human NINL, with positions of predicted 3C<sup>pro</sup> cleavage sites annotated. Shown are the four amino acids

on each side of the predicted cleavage site in human NINL, along with the residue positions and cleavage score predicted using a motif search with the consensus enterovirus cleavage site (see Methods). **(B)** NINL sequences from 12 primate species and mice for each predicted 3C<sup>pro</sup> cleavage site. Amino acid changes relative to human NINL are highlighted in colors to denote differences in polarity and charge. **(C)** Schematic of 3xFLAG-NINL-Myc isoform 1 and isoform 2 constructs, with predicted molecular weights for both amino-terminal (FLAG) and carboxy-terminal (Myc) products upon cleavage by 3C<sup>pro</sup>. **(D)** Immunoblots of extracts from HEK293T cells co-transfected with the indicated NINL constructs and either CVB3 3C<sup>pro</sup> or the catalytically inactive (C147A) CVB3 3C<sup>pro</sup> (mutant). Immunoblots were probed with anti-FLAG (NINL amino-terminus), anti-Myc (NINL carboxy-terminus), anti-HA (3C<sup>pro</sup>), and anti-GAPDH (loading control). Arrows to the left of each immunoblot indicate full-length products as well as products corresponding to cleavage at the indicated amino acid residue. Protein molecular weight markers are shown in kilodaltons (kDa) to the right of each immunoblot. Representative images from three biological replicates are shown. **(E)** Immunoblots of extracts from HEK293T cells transfected with the indicated amino-terminal FLAG and carboxyl-terminal Myc tagged NINL constructs and infected with either CVB3 or EMCV (500,000 PFU/mL, MOI  $\approx$  1.0 for 8 h). Immunoblots were probed with anti-FLAG (NINL amino-terminus), anti-Myc (NINL carboxy-terminus), and anti-GAPDH (loading control). Arrows to the left of each immunoblot indicate full length products as well as products corresponding to CVB3 3C<sup>pro</sup> cleavage at the indicated amino acid residue. Protein molecular weight markers are shown in kilodaltons (kDa) to the right of each immunoblot. Representative images from three biological replicates are shown.

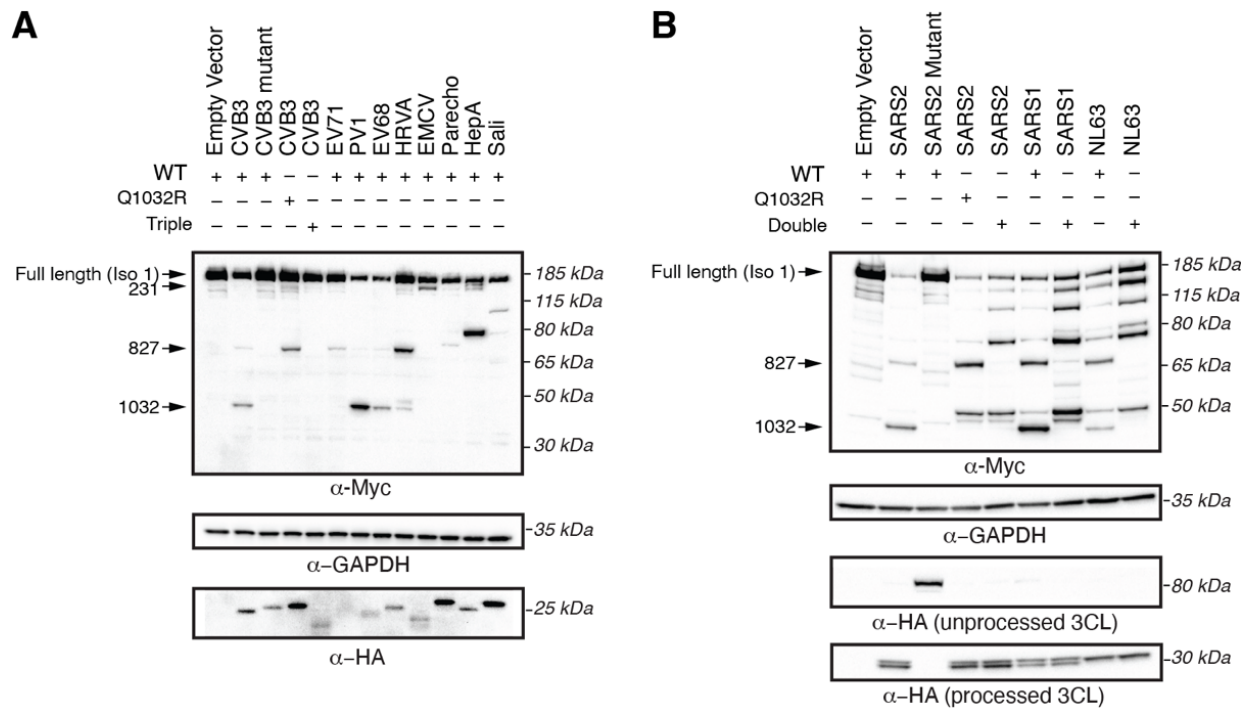

256 transfected with CVB3 3C<sup>pro</sup>, although we did observe weak protease-mediated cleavage at site  
257 231 in isoform 2 (Figure 4D).

258

259 We next sought to understand the degree to which cleavage of NINL is conserved across viral  
260 proteases. We, therefore, tested a panel of 3C<sup>pros</sup> from diverse viruses in the *Picornaviridae* family  
261 (Tsu et al., 2021a). Interestingly, while we found that all proteases tested were able to cleave  
262 NINL to some degree, the strength and position of cleavage was variable, even among proteases  
263 from closely related viruses such as CVB3, enterovirus 71 (EV71), poliovirus (PV1), enterovirus D68  
264 (EV68), and human rhinovirus A (HRVA), all of which are members of the enterovirus genus  
265 (Figure 4–figure supplement 1A). We also tested a panel of 3C-like proteases (3CL<sup>pros</sup>) from  
266 members of the *Coronaviridae* family, including proteases from the betacoronaviruses, SARS-  
267 CoV-2 and SARS-CoV, and an alphacoronavirus, NL63-CoV. We again observed numerous  
268 cleavage products, some of which map to residues 827 and 1032 (Figure 4–figure supplement  
269 1B), consistent with 3C<sup>pros</sup> and 3CL<sup>pros</sup> having similar active sites and cleavage preferences (Ng  
270 et al., 2021). Together, these data indicate that NINL is cleaved at species-specific sites by  
271 various proteases from human viruses. Such host- and virus-specificity of cleavage is a hallmark  
272 of host-virus arms races, further supporting the model that NINL's role in the interferon response  
273 positions it in evolutionary conflict with viruses.

274

275 We next aimed to confirm that infection-mediated cleavage efficiency and specificity recapitulated  
276 results we observed from transiently transfected viral proteases. We therefore infected cells  
277 expressing WT NINL and the NINL triple mutant with CVB3, a virus that encodes a 3C<sup>pro</sup> that  
278 strongly cleaves NINL at multiple sites, and EMCV, a virus that encodes a 3C<sup>pro</sup> that only weakly  
279 cleaves NINL at a single site in the N-terminus (Figure 4–figure supplement 1A). Consistent with  
280 the results we obtained with transfected 3C<sup>pros</sup>, we observed cleavage of NINL at species-specific  
281 sites 231, 827, and 1032 when we infected with CVB3, and little to no cleavage upon EMCV



282 infection (Figure 4E). These data further support that NINL is a target of viral antagonism upon  
283 infection in a manner that is both host- and virus-specific.

284

### 285 **Viral proteases disrupt NINL trafficking function**

286 As NINL is a dynein activating adaptor, we next sought to investigate whether proteolytic cleavage  
287 of NINL could interfere with cargo trafficking. NINL is well known as a centrosome-associated  
288 protein and may also be involved in trafficking endo/lysosomal membranes (Bachmann-Gagescu  
289 et al., 2015; Xiao et al., 2021). In addition, a number of NINL-interacting proteins have been  
290 described (Bachmann-Gagescu et al., 2015; Casenghi et al., 2003; Dona et al., 2015; Kersten et  
291 al., 2012; Redwine et al., 2017; van Wijk et al., 2009). However, in the context of the interferon  
292 response, we have not yet identified a NINL cargo. Thus, we chose to reconstitute NINL's role in  
293 dynein-mediated microtubule transport using a heterologous approach (Kapitein et al., 2010;  
294 Passmore et al., 2021). This well-established method uses an inducible heterodimerization  
295 system (Figure 5A) to induce the movement of normally immotile peroxisomes by recruiting  
296 dynein via an activating adaptor to the peroxisome (Htet et al., 2020; Huynh and Vale, 2017;  
297 Wang et al., 2019). Briefly, a rapamycin-binding FKBP domain was targeted to peroxisome  
298 membranes via the peroxisome targeting sequence (PTS1) of human PEX3. Another rapamycin-  
299 binding FRB domain was fused to the NINL and the NINL triple mutant constructs. We truncated  
300 the NINL constructs at residue 1062 because some activating adaptors are autoinhibited via  
301 interactions between their amino- and carboxy-termini (Liu et al., 2013; Terawaki et al., 2015;  
302 Urnavicius et al., 2015). Co-transfection of cells with CVB3 3C<sup>pro</sup>, PEX3-mEmerald-FKBP, and  
303 WT NINL or the uncleavable NINL triple mutant confirmed that WT NINL is cleaved by CVB3  
304 3C<sup>pro</sup>, while the NINL triple mutant is not (Figure 5B and Figure 5-figure supplement 1A). When  
305 we introduced these constructs into human U-2 OS cells peroxisomes were distributed throughout  
306 the cytoplasm (Figure 5C and Figure 5-figure supplement 1B, C), but redistributed to the  
307 centrosome upon the addition of the rapamycin analog, rapalog (which induces dimerization of

308 FRB and FKBP (Ho et al., 1996) (Figure 5C-E). In contrast, when NINL was co-expressed with  
309 CVB3 3C<sup>pro</sup>, peroxisomes no longer localized to the centrosome (Figure 5C-E). However, the  
310 uncleavable NINL triple mutant was still able to redistribute peroxisomes in the presence of CVB3  
311 3C<sup>pro</sup> just as effectively as U-2 OS cells not expressing CVB3 3C<sup>pro</sup> (Figure 5C-E). Finally, to  
312 determine if viral infection could also disrupt NINL-mediated trafficking, we infected cells with  
313 CVB3 following transfection of PEX3-mEmerald-FKBP, and WT NINL or the uncleavable NINL  
314 triple mutant. Similar to transfection with viral protease, live CVB3 infection led to a significant  
315 reduction in peroxisomes that localized to the centrosome in cells expressing NINL, but not in  
316 cells expressing the uncleavable NINL triple mutant (Figure 6A, B and Figure 6-figure supplement  
317 1A, B). Together, these data demonstrate that site-specific cleavage of NINL by CVB3 3C<sup>pro</sup> could  
318 disrupt NINL's role in cargo transport.

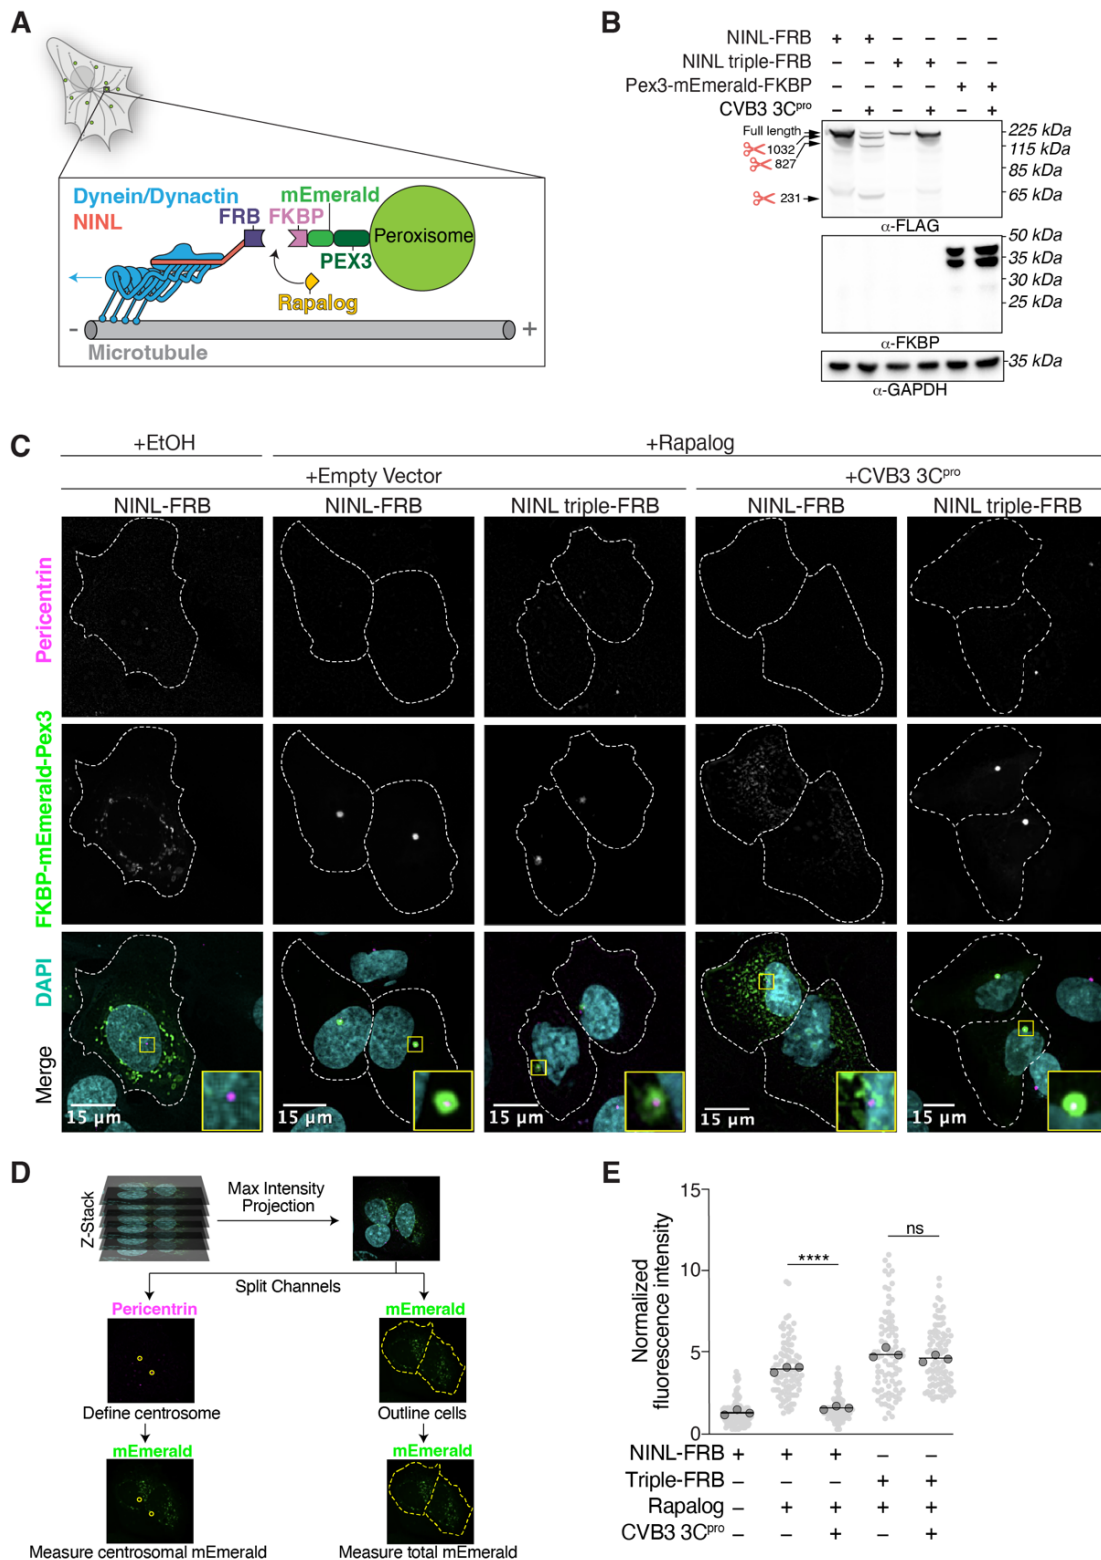

**Figure 5. CVB3 3C<sup>pro</sup> cleavage of NINL prevents rapalog-induced dynein-dependent transport of intracellular cargoes.** (A) Schematic of the peroxisomal trafficking assay. The peroxisomal targeting signal (PTS1) of human PEX3 (amino acids 1–42) was fused to mEmerald and FKBP and a truncated NINL (amino acids 1-1062) was fused to FRB. Dynein-dependent accumulation of peroxisomes at the centrosome, where most minus-ends are located, is initiated by the rapalog-mediated heterodimerization of FKBP and FRB. Blue arrow indicates dynein motility. (B) Indicated FRB and FKBP

constructs transiently expressed with (+) or without (-) the transient co-expression of HA-tagged CVB3 3C<sup>pro</sup> in HEK293T cells. Immunoblots were probed with anti-FLAG, anti-FKBP, anti-GAPDH and anti-HA antibodies. Protein molecular weight markers are shown in kilodaltons (kDa) to the left of each immunoblot. Representative images from three biological replicates are shown. **(C)** Confocal micrographs are displayed as maximum intensity projections of U-2 OS cells, transfected with Pex3-mEmerald-FKBP and the indicated cleavable or uncleavable NINL-FRB fusion constructs with or without the co-expression of CVB3 3C<sup>pro</sup>. Where indicated, cells were treated for one hour with ethanol (EtOH) as a control or 1  $\mu$ M rapalog in EtOH prior to fixation. Centrosomes were immunostained with anti-pericentrin and nuclei were visualized with DAPI. 15  $\mu$ m scale bars indicated in lower left corner of merged micrographs. Yellow rectangles denote region of cropped inset. Dashed white lines denote cellular boundaries. Representative micrographs from three biological replicates are shown. **(D)** Schematic of the analysis pipeline. **(E)** Quantification of peroxisomal trafficking assays from three biological replicates. The fluorescence intensity of Pex3-mEmerald-FKBP at the centrosome was normalized to the whole-cell fluorescence, and to the areas of the regions of interest used to quantify centrosome versus whole-cell fluorescence. Each datapoint corresponds to an individual cell. The dark grey, large, outlined circles correspond to the mean for each biological replicate. For each condition  $n = \sim 80$ . The mean across all replicates is denoted by the bold line. Data were analyzed using Kruskal–Wallis with Dunn’s post hoc test for multiple comparisons. \*\*\*\* $p < 0.0001$ , ns = not significant.

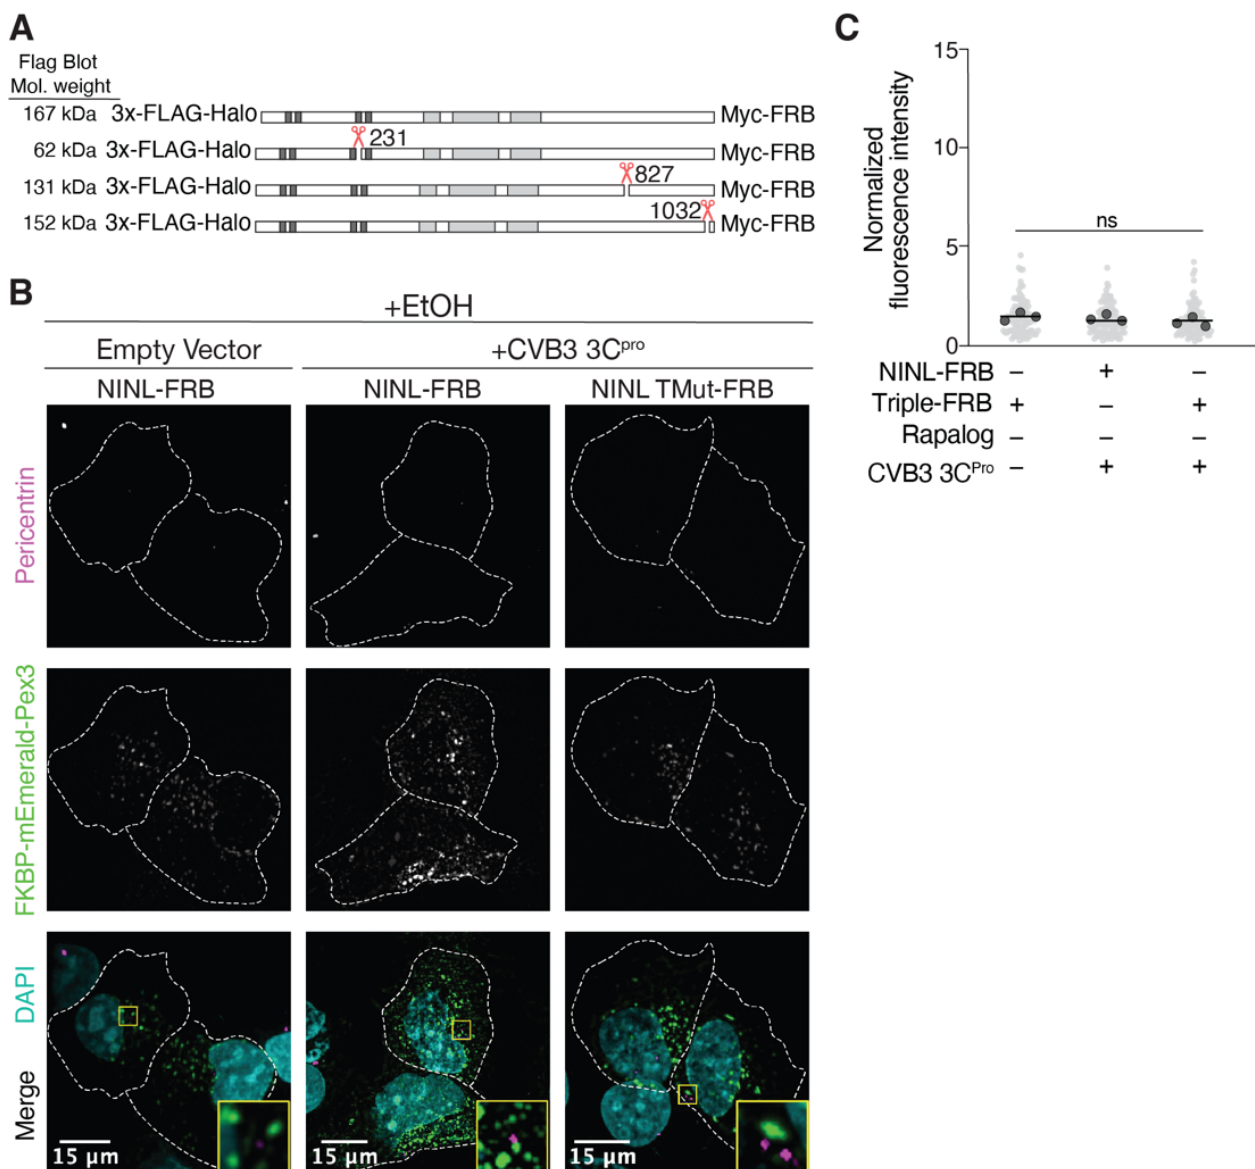

**Figure 5–figure supplement 1. Peroxisome distribution remains consistent regardless of presence of CVB3 3C<sup>pro</sup> prior to rapalog induced dynein-dependent transport.** (A) Schematic of NINL-FRB fusion constructs. Predicted molecular weights for each 3xFLAG tagged amino-terminal cleavage product produced by 3C<sup>pro</sup>. (B) Peroxisome distribution controls. Confocal micrographs displayed as maximum intensity projections of U-2 OS cells, transfected with Pex3-mEmerald-FKBP and the indicated cleavable or uncleavable NINL-FRB fusion constructs with or without the co-expression of CVB3 3C<sup>pro</sup> treated for one hour with ethanol (EtOH) prior to fixation. Centrosomes were immunostained with anti-pericentrin and nuclei were visualized with DAPI. 15  $\mu$ m scale bars are indicated in the lower left corner of the merged micrographs. Yellow rectangles denote region of cropped inset. Dashed white lines denote cellular boundaries. Representative micrographs from three biological replicates are shown. (C) Quantification of peroxisomal trafficking assay from three biological replicates. The fluorescence intensity of Pex3-mEmerald-FKBP at the centrosome was normalized to the whole-cell fluorescence, and to the areas of the regions of interest used to quantify centrosome versus whole-cell fluorescence. Each datapoint corresponds to an individual cell and biological replicates can be distinguished by shade. For each condition  $n = \sim 80$ . The mean across all replicates is denoted by the bold line. Bold circles correspond to the mean for each biological replicate. Data were analyzed using Kruskal–Wallis with Dunn’s post hoc test for multiple comparisons. ns = not significant.

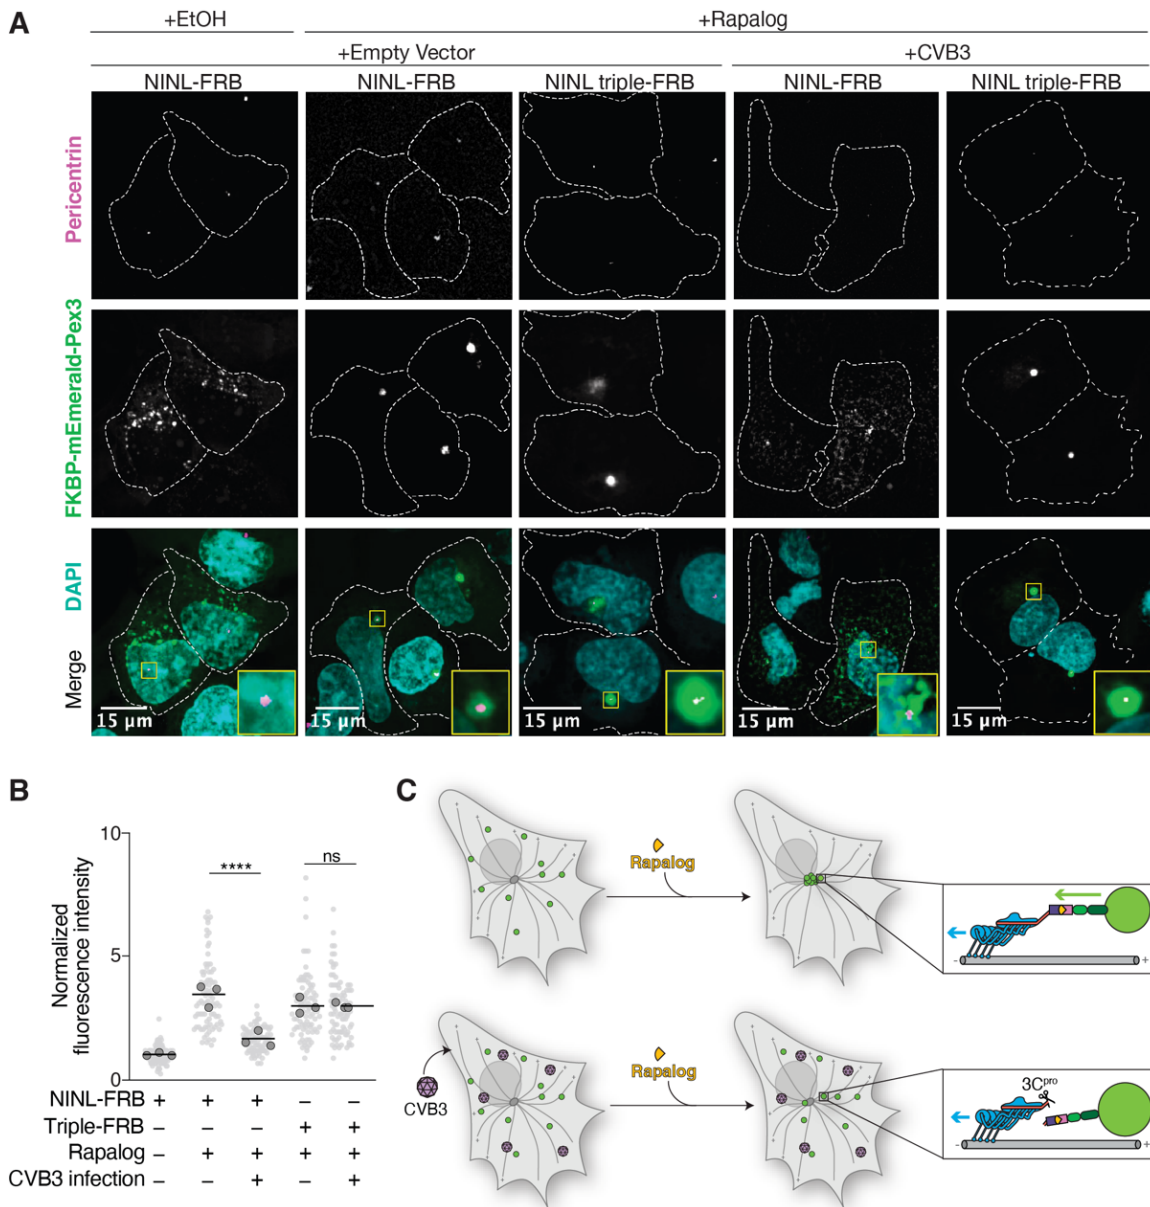

**Figure 6. Cleavage of NINL during viral infection prevents dynein-dependent transport of an intracellular cargo. (A)** Confocal micrographs displayed as maximum intensity projections of uninfected or CVB3 infected U-2 OS cells. Cells were transfected with Pex3-mEmerald-FKBP and the indicated cleavable or uncleavable NINL-FRB fusion constructs, and infected (or mock infected) with CVB3 (500,000 PFU/ml, MOI = ~2) for five hours. Cells were then treated for one hour with ethanol (EtOH) or 1  $\mu$ M rapalog prior to fixation. Centrosomes were immunostained with anti-pericentrin and nuclei were visualized with DAPI. 15  $\mu$ m scale bars are indicated in the lower left corner of the merged micrographs. Yellow rectangles denote region of cropped inset. Dashed white lines denote cellular boundaries. Representative micrographs from three biological replicates are shown. **(B)** Quantification of peroxisomal trafficking assays from three biological replicates. The fluorescence intensity of Pex3-mEmerald-FKBP at the centrosome was normalized to the whole-cell fluorescence, and to the areas of the regions of interest used to quantify centrosome versus whole-cell fluorescence. Each datapoint corresponds to an individual cell and biological replicates can be distinguished by shade. For each condition  $n = \sim 80$ . The mean across all replicates is denoted by the bold line. Bold circles correspond to the mean for each biological replicate. Data were analyzed using Kruskal–Wallis with Dunn’s post hoc test for multiple comparisons. \*\*\*\* $p < 0.0001$ , ns = not significant. **(C)** Schematic of the rapalog-induced pericentrosomal accumulation of peroxisomes and loss of accumulation upon viral infection.

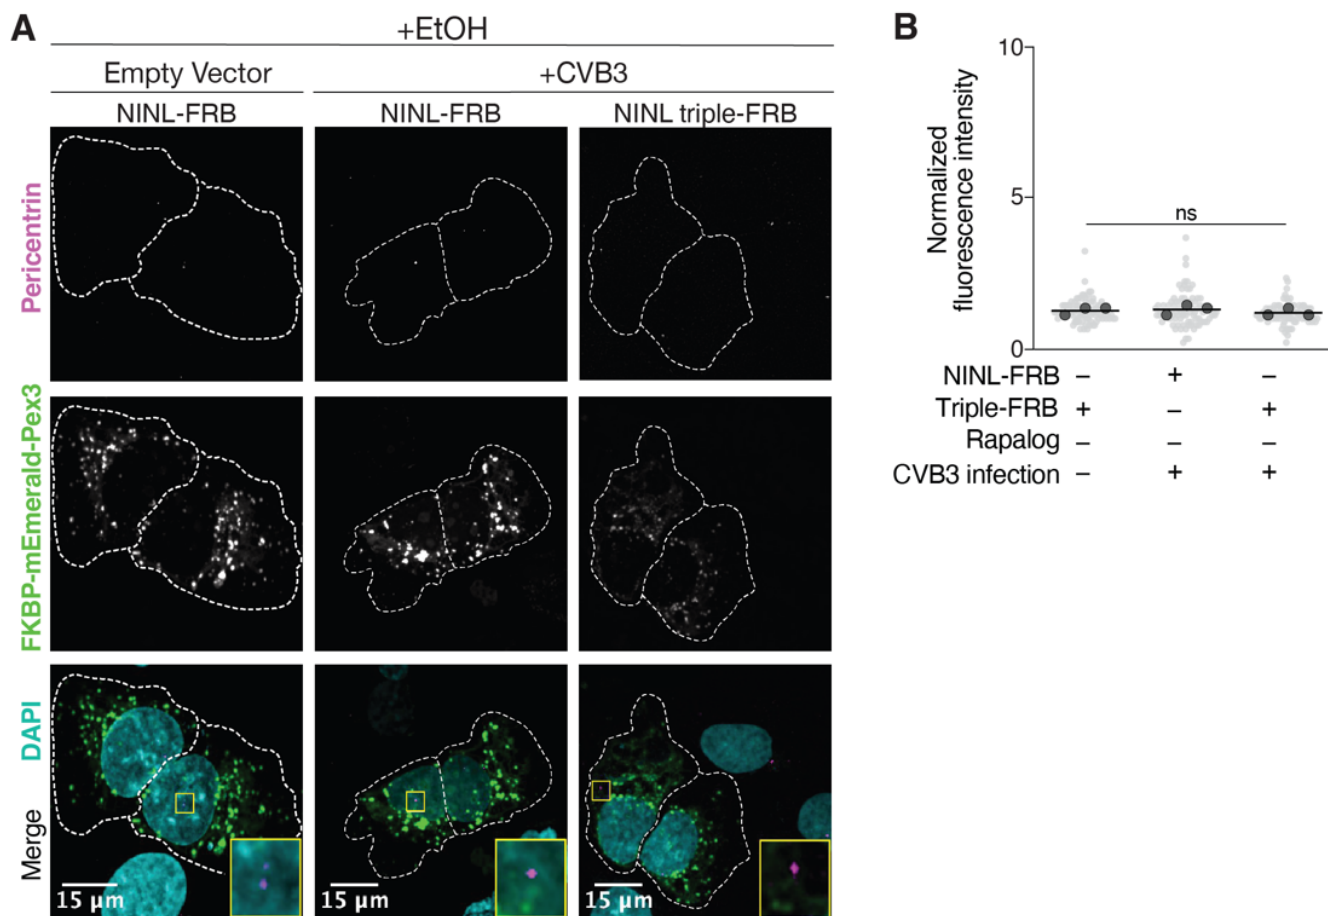

**Figure 6—figure supplement 1. Peroxisome distribution remains consistent regardless of CVB3 infection prior to rapalogs induced dynein-mediated transport. (A)** Peroxisome distribution controls. Confocal micrographs displayed as maximum intensity projections of uninfected or CVB3 infected U-2 OS cells expressing Pex3-mEmerald-FKBP and the indicated cleavable or uncleavable NINL-FRB fusion constructs treated for one hour with ethanol (EtOH) prior to fixation. Centrosomes were immunostained with anti-pericentrin and nuclei were stained with DAPI. 15 μm scale bars are indicated in the lower left corner of the merged micrographs. Yellow rectangles denote region of cropped inset. Dashed white lines denote cellular boundaries. Representative micrographs from three biological replicates are shown. **(B)** Quantification of peroxisomal trafficking assays from three biological replicates. Fluorescence intensity of Pex3-mEmerald-FKBP at the centrosome was normalized to the whole-cell fluorescence, and to the areas of the regions of interest used to quantify centrosome versus whole-cell fluorescence. Each datapoint corresponds to an individual cell and biological replicates can be distinguished by shade. For each condition n = ~80. The mean across all replicates is denoted by a bold line. Bold circles correspond to the mean for each biological replicate. Data were analyzed using Kruskal–Wallis with Dunn’s post hoc test for multiple comparisons. ns = not significant.

## 319 **Discussion**

320

321 Pathogenic viruses and their hosts are engaged in genetic conflicts at every step of the viral life  
322 cycle. Each of these points of conflict, which center on direct interactions between viral and host  
323 proteins, have the potential to determine the degree to which a virus replicates and causes  
324 pathogenesis in a host cell, and the degree to which the immune system can inhibit viral  
325 replication. As such, evolutionary adaptation in both host and viral genomes shape these  
326 molecular interactions, leaving behind signatures of rapid evolution that can serve as beacons for  
327 points of host-virus interaction (Daugherty and Malik, 2012; Duggal and Emerman, 2012;  
328 Tenthorey et al., 2022). Here we use this evolutionary principle to reveal an antiviral role for the  
329 dynein activating adaptor NINL. Unique among 36 analyzed dynein, dynactin, and activating  
330 adaptor genes, we found that NINL displays a signature of recurrent positive selection in primates.  
331 Based on this unusual evolutionary signature in an otherwise highly conserved cellular machine,  
332 we hypothesized that NINL may be engaged in an undescribed host-pathogen conflict. Using  
333 multiple cell types and knockout clones, we reveal that loss of NINL results in reduced activation  
334 of the antiviral innate immune response following IFN $\alpha$  treatment. Consequently, in NINL KO cells  
335 several RNA and DNA viruses show significantly increased replication after IFN $\alpha$  pretreatment  
336 relative to WT cells. These results indicate NINL plays an important role in the antiviral immune  
337 response.

338

339 Further work will be required to determine the mechanistic basis for NINL's antiviral function. The  
340 role of activating adaptors in inducing processive dynein motility was only described in 2014  
341 (McKenney et al., 2014; Schlager et al., 2014). Since that time, the number of established  
342 activating adaptors has rapidly expanded, as has our understanding of the molecular interactions  
343 between activating adaptors and dynein/dynactin (Agrawal et al., 2022; Cason et al., 2021;  
344 Chaaban and Carter, 2022; Fenton et al., 2021; Lau et al., 2021; Lee et al., 2020; Olenick and



345 Holzbaur, 2019; Reck-Peterson et al., 2018). However, for many activating adaptors, including  
346 NINL, much less is known about cargo specificity. Our observation that NINL KO cells have a  
347 defect in ISG production following IFN $\alpha$  treatment, despite normal phosphorylation of the STAT1  
348 and STAT2 transcription factors, suggests a role for NINL in the IFN signaling pathway. These  
349 results are consistent with recent gene enrichment analyses implicating NINL in several immune  
350 pathways, including JAK-STAT signaling (Chen et al., 2022). However, whether a signaling  
351 complex is a direct cargo of NINL, or whether NINL's interaction with dynein and dynactin is  
352 required for this function, remain to be determined. Notably, we observe several transcriptional  
353 changes in NINL KO cells relative to WT cells, suggesting that NINL plays regulatory roles in the  
354 cell beyond our observation of its role in the IFN effect. Like other activating adaptors,  
355 understanding the full range of cargos and biological functions of NINL will require additional  
356 studies.

357

358 Despite the uncertainty of NINL's mechanistic role in the antiviral immune response, we find that  
359 several viruses can antagonize NINL function through proteolytic cleavage. Using the model  
360 enterovirus, CVB3, we show that the virally-encoded 3C protease (3C<sup>pro</sup>) cleaves human NINL at  
361 three independent sites, all of which toggle between cleavable and uncleavable even among  
362 closely related primates. These changes within the cleavage sites of NINL in primates suggest  
363 that virally-encoded proteases are one potential evolutionary pressure that is driving the rapid  
364 evolution of NINL, similar to other molecular arms races between viral proteases and host proteins  
365 (Tsu et al., 2021b). Related 3C<sup>pros</sup> from other picornaviruses, as well as 3CL<sup>pros</sup> from  
366 coronaviruses, also cleave NINL. Intriguingly, even closely related proteases, for instance 3C<sup>pros</sup>  
367 within the enterovirus clade, have different site preferences within NINL, suggesting that viral  
368 protease evolution may be shaping its interactions with NINL. Indeed, among the diversity of  
369 picornavirus and coronavirus proteases we tested, we find that that NINL cleavage is almost  
370 universally maintained despite a wide array of site preferences and cleavage efficiencies. These

371 data indicate that numerous viral proteases convergently cleave NINL, reminiscent of other  
372 convergently antagonized targets in the innate antiviral response such as MAVS, TRIF, and  
373 NEMO (Tsu et al., 2021b). Compellingly, cleavage of NINL by 3C<sup>pro</sup> during viral infection disrupts  
374 the NINL-mediated transport of a heterologous cargo. Along with our data indicating that one  
375 function of NINL is to potentiate the innate immune response, these data suggest that cleavage  
376 of NINL could be a host-specific mechanism employed by viruses to disrupt the antiviral immune  
377 response and promote their own replicative success.

378

379 Altogether, our study demonstrates the effectiveness of leveraging genetic signatures of  
380 pathogen-driven evolution to identify new components of host innate immunity. Our insights into  
381 the conflict between viruses and NINL provides a glimpse into the impact that viruses may have  
382 on the evolution of the intracellular transport machinery and identify a new role for a dynein  
383 activating adaptor in the antiviral immune response. These results indicate that components of  
384 the otherwise conserved cytoplasmic dynein transport machinery can be engaged in host- and  
385 virus-specific interactions and suggest intracellular transport could be an important battleground  
386 for host-virus arms races.

387

## 388 **Materials and Methods**

389

### 390 **Evolutionary analysis**

391 For evolutionary analyses of dynein, dynactin, and activating adaptor genes, Uniprot reference  
392 protein sequences were used as a search query against NCBI's non-redundant (NR) database  
393 using tBLASTn (Altschul et al., 1990). For each primate species, the nucleotide sequence with  
394 the highest bit score was downloaded and aligned to the human ORF nucleotide sequence using  
395 MAFFT (Kato, 2002) implemented in Geneious software (Dotmatrix; geneious.com). Poorly  
396 aligning sequences or regions were removed from subsequent analyses. Maximum likelihood

397 (ML) tests were performed with codeml in the PAML software suite (Yang, 2007). Aligned  
398 sequences were subjected to ML tests using NS sites models disallowing (M7) or allowing (M8)  
399 positive selection. The p-value reported is the result of a chi-squared test on twice the difference  
400 of the log likelihood (lnL) values between the two models using two degrees of freedom. Analyses  
401 were performed using two models of frequency (F61 and F3x4) and both sets of values are  
402 reported. For each codon model, we confirmed convergence of lnL values by performing each  
403 analysis using two starting omega (dN/dS) values (0.4 and 1.5). For evolutionary analyses of the  
404 isolated NINL amino-terminal (dynein/dynactin binding) and carboxy-terminal (cargo binding)  
405 regions, the full-length alignment was truncated to only include codons 1-702 or 703-1382  
406 respectively and PAML analyses were performed as described above.

407  
408 We used three independent methods to estimate codons within NINL that have been subject to  
409 positive selection. PAML was used to identify positively selected codons with a posterior  
410 probability greater than 0.90 using a Bayes Empirical Bayes (BEB) analysis and the F61 codon  
411 frequency model. The same NINL alignment was also used as input for FEL (Kosakovsky Pond  
412 and Frost, 2005) and MEME (Murrell et al., 2012) using the DataMonkey (Weaver et al., 2018)  
413 server. In both cases, default parameters were used and codons with a signature of positive  
414 selection with a p-value of <0.1 are reported. In all cases, codon numbers correspond to the amino  
415 acid position and residue in human NINL (NCBI accession NM\_025176.6).

416

### 417 **Molecular cloning**

418 For the plasmid-based CRISPR/Cas9-mediated knockout of NIN and NINL we designed gRNA  
419 target sequences with the web tool CHOPCHOP (Labun et al., 2016), available at  
420 chopchop.cbu.uib.no, and synthesized oligonucleotides from Eton Biosciences (San Diego, CA,  
421 USA). Each oligonucleotide pair was phosphorylated and annealed using the T4 Polynucleotide  
422 Kinase (New England Biolabs, Ipswich, MA, USA). Duplexed oligonucleotides were ligated into

423 BbsI (New England Biolabs) digested pSpCas9(BB)-2A- Puro (pX459) V2.0, a gift from Feng  
424 Zhang (Addgene plasmid #62988), using the Quick Ligase kit (New England Biolabs). For  
425 cleavage assays, the coding sequence of human NINL isoform 1 (NCBI accession NM\_025176.6)  
426 was subcloned from the previously described pcDNA5/FRT/TO-BioID-NINL-3xFLAG (Redwine et  
427 al., 2017) and inserted into pcDNA5/FRT/TO with as part of the following cassette: mCherry-P2A-  
428 3xFLAG-NINL-Myc. NINL mutants (Q1032R, Q827/1032R, Q231/827/1032R), human NINL  
429 isoform 2 (NCBI accession NM\_001318226.2) and the NINL isoform 2 mutant (Q231R) were  
430 mutagenized using the Q5 Site-Directed Mutagenesis Kit (New England BioLabs). The plasmids  
431 encoding 3C proteases (coxsackievirus B3 (CVB3) 3C<sup>pro</sup>, catalytically inactive (C147A) CVB3  
432 3C<sup>pro</sup>, enterovirus A71 (EV71) 3C<sup>pro</sup>, poliovirus 1 (PV1) 3C<sup>pro</sup>, enterovirus D68 (EV68) 3C<sup>pro</sup>, human  
433 rhinovirus A (HRVA) 3C<sup>pro</sup>, encephalomyocarditis virus (EMCV) 3C<sup>pro</sup>, parechovirus A (Parecho)  
434 3C<sup>pro</sup>, hepatitis A virus (HepA) 3C<sup>pro</sup>, and salivirus A (Sali) 3C<sup>pro</sup>) have been described previously  
435 (Tsu et al., 2021a). To ensure that 3CL<sup>pro</sup>s have precise amino- and carboxy-termini as a result of  
436 self-cleavage, sequences for 3CL proteases (SARS2 3CL<sup>pro</sup>, SARS1 3CL<sup>pro</sup>, and NL63 3CL<sup>pro</sup>),  
437 including nine residues from the upstream coding region (nsp4) and downstream coding region  
438 (nsp6) were ordered as gBlocks (Integrated DNA Technologies, Coralville, IA) (Supplementary  
439 File 5) and cloned into the pQCXIP backbone flanked by an N-terminal eGFP and a C-terminal  
440 mCherry-HA sequence. Catalytically inactive (C145A) SARS2 3CL<sup>pro</sup> was made using  
441 overlapping stitch PCR. For the peroxisome trafficking assay, the peroxisomal membrane-  
442 targeting sequence (amino acids 1–42) of human PEX3 (NCBI accession NM\_003630) with a  
443 carboxy-terminal mEmerald fluorescent protein and FKBP was subcloned from the previously  
444 described pcDNA5-PEX3-Emerald-FKBP (Htet et al., 2020) and into the pcDNA3.1(+) backbone.  
445 3xFLAG-Halo-NINL(1-1062)-Myc-FRB was synthesized as a gBlock (Integrated DNA  
446 Technologies) and cloned into the pcDNA3.1(+) backbone. To generate an uncleavable mutant  
447 of this construct we used sequential Q5 mutagenesis to achieve Q231/827/1032R. Following  
448 cloning, all plasmids were verified with whole plasmid sequencing. Plasmids and primers used in

449 this study can be found in Supplementary File 5. All newly created plasmids will be made available  
450 upon request.

451  
452 **Transfections**  
453 All transfections in this study were performed with TransIT-X2® Transfection Reagent (Mirus Bio,  
454 Madison, WI, USA) according to the manufacturer's instructions. Briefly, 18-24 hours prior to  
455 transfection the desired cells were plated at an appropriate density such that they would be ≥80%  
456 confluent at time of transfection. TransIT-X2:DNA complexes were formed following the  
457 manufacturer's protocol. The TransIT-X2:DNA complexes were then evenly distributed to cells  
458 via drop-wise addition and were incubated in a humidified 5% CO<sub>2</sub> atmosphere at 37°C for until  
459 they were harvested, assayed, or placed into selection as described below.

460  
461 **Cell lines**  
462 All cell lines used in this study were sourced from the American Type Culture Collection (ATCC;  
463 Manassas, VA) unless otherwise indicated and maintained in a humidified 5% CO<sub>2</sub> atmosphere  
464 at 37°C. All cell lines are routinely tested for mycoplasma by PCR kit (ATCC). HEK293T (human  
465 embryonic kidney epithelial cells, ATCC CRL-3216), A549 (human alveolar adenocarcinoma  
466 cells, ATCC CCL-185), U-2 OS (human epithelial osteosarcoma cells, ATCC HTB-96), BSC40  
467 (grivet kidney epithelial cells, ATCC CRL-2761), Vero (African green monkey kidney epithelial  
468 cells, ATCC CCL-81), and BHK-21 (Syrian golden hamster kidney fibroblast cells, ATCC CCL-  
469 10) were maintained in complete growth media which is composed of Dulbecco's Modified Eagle's  
470 Medium with 4.5g/L glucose, L-glutamine, and sodium pyruvate (DMEM; Corning, Manassas,  
471 VA, USA) supplemented with 10% (v/v) fetal bovine serum (FBS; Gibco, Grand Island, NY, USA)  
472 and 1% (v/v) Penicillin/Streptomycin (PenStrep; Corning). Flp-In™ T-REx™ HCT116 (human  
473 colorectal carcinoma cells) were a gift from E. Bennett at the University of California San Diego  
474 (La Jolla, CA, USA) but originated in the laboratory of B. Wouters at the University of Toronto

475 (Toronto, ON, Canada) and were maintained in complete growth media supplemented with 100  
476  $\mu\text{g/ml}$  Zeocin. Cells are routinely tested for mycoplasma contamination using mycoplasma by  
477 PCR kit (ATCC, Manassas, VA) and kept at low passage to maintain less than one year since  
478 acquisition or generation.

479

#### 480 **CRISPR/Cas9-mediated gene editing**

481 To generate NIN and NINL knock outs in A549, HCT116 and U-2 OS cell lines, the cells were  
482 transfected with 250 ng of the pX459 vector containing the appropriate gRNAs. Transfected cells  
483 were enriched 48 hours post-transfection by culturing them with complete growth media  
484 supplemented with 1  $\mu\text{g/ml}$  puromycin for 48 hours and then were allowed to recover for 24 hours  
485 in complete growth media without puromycin. Following enrichment of transfected cells,  
486 monoclonal cell lines were obtained by expanding single-cell clones isolated by limiting dilution.  
487 The resulting clones were screened via immunoblotting with gene-specific antibodies anti-NINL  
488 rabbit polyclonal antibody (Thermo Fisher Scientific, Waltham, MA, USA) and anti-NIN mouse  
489 monoclonal antibody (LSBio, Seattle, WA, USA). Clones determined to be knockouts via  
490 immunoblotting were screened further to confirm the presence of CRISPR-induced indels in each  
491 allele of the targeted gene. Genomic DNA was isolated using the *DNeasy Blood & Tissue Kit*  
492 (Qiagen, Hilden, Germany) and the target exons were amplified with *EconoTaq* polymerase  
493 (Lucigen, Middleton, WI, USA). The resulting amplicons were subcloned using the TOPO TA  
494 Cloning Kit for Sequencing (Thermo Fisher Scientific) and transformed into DH5 $\alpha$  competent  
495 cells. Single colonies were picked, and the plasmids were isolated by miniprep (Qiagen) and  
496 sequenced individually using T3 and T7-Pro primers. All newly created cell lines will be made  
497 available upon request.

498

#### 499 **Immunoblotting**

500 Harvested cell pellets were washed with 1X PBS, and unless otherwise noted, lysed with RIPA  
501 lysis buffer: 50 mM 2-Amino-2-(hydroxymethyl)propane-1,3-diol (Tris), pH 7.4; 150 mM sodium  
502 chloride (NaCl); 1% (v/v) Octylphenyl-polyethylene glycol (IGEPAL CA-630); 0.5% (w/v) Sodium  
503 Deoxycholate (DOC); and 0.1% (w/v) Sodium Dodecyl Sulfate (SDS); 1 mM Dithiothreitol (DTT);  
504 and cOmplete Protease Inhibitor Cocktail (Roche, Basel, Switzerland) at 4°C for 10 minutes with  
505 end-over-end rotation. Lysates were then centrifuged at maximum speed in a 4°C microcentrifuge  
506 for 10 min. The supernatants were transferred to new microcentrifuge tubes and supplemented  
507 with NuPage LDS sample buffer (Invitrogen, Carlsbad, CA) and NuPage reducing agent  
508 (Invitrogen) prior to a 10 minute heat denaturation at 95°C. Lysates were resolved on a 4–12%  
509 Bis-Tris SDS-PAGE gel (Life Technologies, San Diego, CA), followed by wet transfer to PVDF  
510 membranes (Bio-Rad, Hercules, CA) for 4 hours at 85V using Towbin buffer: 25mM Tris base, pH  
511 9.2; 192 mM Glycine; 20% (v/v) Methanol. Immunoblots were blocked with 5% (w/v) blotting grade  
512 nonfat dry milk (Apex Bioresearch Products) in TBS-T: 20 mM Tris pH 7.4; 150 mM NaCl, 0.1%  
513 Polysorbate 20 (Tween 20) for 1 hour. Primary antibodies were diluted in TBS-T supplemented  
514 with 5% (w/v) BSA and rocked overnight. Primary antibody adsorbed membranes were rinsed  
515 three times in TBS-T and subsequently incubated with the appropriate HRP-conjugated  
516 secondary antibodies. Membranes were rinsed again three times in TBS-T and developed with  
517 SuperSignal West Pico PLUS Chemiluminescent Substrate (Thermo Fisher Scientific) on a  
518 ChemiDoc MP Imaging System (Bio-Rad) using Imagemag (Bio-Rad) software. Specifications for  
519 antibodies are described in Supplementary File 6.

520         The ability of Cas9 Control, NINL KO, and NIN KO to respond to IFN $\alpha$  was assayed by  
521 first culturing cells in the presence or absence of 1000U IFN $\alpha$ . Eighteen hours post-treatment with  
522 IFN $\alpha$  the cells were harvested, lysed and immunoblotted as described above for STAT1,  
523 Phospho-STAT1 (Tyr701), STAT2, Phospho-STAT2 (Tyr690), MX1, IFIT3, OAS1, and ISG15  
524 (Supplementary File 6).

525

## 526 **RNASeq and analysis**

527 All experiments for RNAseq were performed with three biological replicates. Total RNA from  
528 mock-treated or IFN $\alpha$ -treated cell lines (1000 U, 24 hour treatment) was extracted using an  
529 RNeasy Plus Mini Kit (Qiagen) as indicated in the manufacturer's protocol. The Illumina Stranded  
530 mRNA prep kit was used to generate dual-indexed cDNA libraries and the resulting libraries were  
531 sequenced on an Illumina NovaSeq 6000 instrument. Total RNA was assessed for quality using  
532 an Agilent TapeStation 4200, and samples with an RNA Integrity Number (RIN) greater than 8.0  
533 were used to generate RNA sequencing libraries using the TruSeq Stranded mRNA Sample Prep  
534 Kit with TruSeq Unique Dual Indexes (Illumina, San Diego, CA). Samples were processed  
535 following manufacturer's instructions, starting with 500 ng of RNA and modifying RNA shear time  
536 to five minutes. Resulting libraries were multiplexed and sequenced with 100 basepair (bp) paired  
537 end reads (PE100) to a depth of approximately 25 million reads per sample on an Illumina  
538 NovaSeq 6000 instrument. Samples were demultiplexed using bcl2fastq v2.20 Conversion  
539 Software (Illumina, San Diego, CA). Sequencing reads were quantified with Salmon (Patro et al.,  
540 2017) in a quasi-mapping-based mode to the reference genome. Read quantifications were  
541 imported and differentially expressed genes across experimental conditions were identified using  
542 the R package DESeq2 (Love et al., 2014). Reactome pathway analysis was performed by  
543 inputting the list of genes with significantly lower expression (adjusted p-value  $\leq 0.05$ , log<sub>2</sub>-fold  
544 change  $\leq -1$ ) in NINL KO cells treated with IFN $\alpha$  relative to WT cells treated with IFN $\alpha$  into the  
545 "Analyze Gene List" tool at reactome.org (Jassal et al., 2020). RNA sequencing data have been  
546 deposited in GEO under accession code GSE20678  
547 (<https://www.ncbi.nlm.nih.gov/geo/query/acc.cgi?acc=GSE206784>).

548

## 549 **Viral stocks**

550 CVB3 and EMCV viral stocks were generated by co-transfection of CVB3-Nancy or EMCV-Mengo  
551 infectious clone plasmids with a plasmid expressing T7 RNA polymerase (generous gifts from Dr.



552 Julie Pfeiffer, UT Southwestern, see Supplementary File 5) as previously described (McCune et  
553 al., 2020). The supernatant was harvested, quantified by plaque assay on Vero cells (CVB3) (see  
554 below) or TCID50 on HEK293T cells (EMCV), and frozen in aliquots at  $-80^{\circ}\text{C}$ . Wild-type vaccinia  
555 virus Western Reserve strain (NCBI accession NC\_006998.1) (VacV WT) and the J3 cap1-  
556 methyltransferase K175R vaccinia virus mutant (Latner et al., 2002) (VacV J3) were gifts from Dr.  
557 Richard Condit (University of Florida). VacV was amplified in BHK cells and quantified by plaque  
558 assay as described below. VSV-GFP (Indiana strain, gift from Dr. John Rose (Yale University))  
559 was amplified in BSC40s and quantified by plaque assay as described below. Sindbis virus (SinV)  
560 was generated by electroporation of *in vitro* transcribed RNA from plasmid SINV TE/5'2J-GFP  
561 (strain Toto1101, from Dr. Charles Rice, Rockefeller University) into BHK cells as previously  
562 described (Bick et al., 2003) and quantified by plaque assay on BHK cells as described below.

563

#### 564 **Viral Infection and quantification**

565 For quantification of VSV and SinV, cells (as indicated in each experiment) were seeded in 24-  
566 well plates and grown overnight, followed by the addition of 2,500 plaque forming units (PFU)/well  
567 of VSV or 250,000 PFU/well SinV. Nine hours after infection for VSV or 24 hours after infection  
568 for SinV, viral supernatant was harvested from infected cells. The resulting supernatant was  
569 serially 10-fold diluted in 24-well plates in DMEM containing 10% FBS and overlaid on BHK cells  
570 (ATCC) at 80% confluency for 1 hour. Supernatant was removed from cells 60-120 minutes post-  
571 infection and cells were overlaid with complete DMEM media containing 0.8% carboxymethyl  
572 cellulose (MilliporeSigma, Burlington, MA, USA). After 24 hours, the overlay was aspirated and  
573 the cells were stained with 0.1% Crystal Violet in 20% ethanol, and then de-stained with 20%  
574 ethanol. Viral concentrations were determined by manually counting plaques.

575 For quantification of CVB3, cells (as indicated in each experiment) were seeded in 24-well  
576 plates and grown overnight, followed by the addition of 25,000 PFU/well virus. Twenty-four hours  
577 after infection, viral supernatant was harvested from the infected cells, serially 10-fold diluted in

578 12-well plates in DMEM containing 10% FBS and overlaid on Vero cells (ATCC) at 80%  
579 confluency for 1 hour. Supernatant was removed from cells 60-120 minutes post-infection and  
580 cells were overlaid with complete DMEM media containing 1% agarose (Fisher Scientific) and 1  
581 mg/mL neomycin (Research Products International, Mount Prospect, IL, USA) to enhance plaque  
582 visualization (Woods Acevedo et al., 2019). After 48 hours, agarose plugs were washed out with  
583 water and the cells were stained with 0.1% Crystal Violet in 20% ethanol, and then de-stained  
584 with 20% ethanol. Viral concentrations were determined by manually counting plaques.

585 For quantification of VacV WT and VacV J3, cells (as indicated in each experiment) were  
586 seeded in 24-well plates and grown overnight, followed by the addition of 25,000 PFU/well virus.  
587 Twenty-four hours after infection, cell-associated virus was harvested by freeze-thaw lysis of the  
588 infected cells. Following pelleting of cell debris, virus-containing supernatant was serially 10-fold  
589 diluted in 24-well plates in DMEM containing 10% FBS and overlaid on BSC40 cells (ATCC) at  
590 80% confluency. After 48 hours, the medium was aspirated, and the cells were stained with 0.1%  
591 Crystal Violet in 20% ethanol, and then de-stained with 20% ethanol. Viral concentrations were  
592 determined by manually counting plaques.

593

#### 594 **Prediction of NINL cleavage sites by enterovirus 3C<sup>pro</sup>**

595 Putative enterovirus 3C<sup>pro</sup> cleavage sites within human NINL were predicted using a previously  
596 generated polyprotein cleavage motif (Tsu et al., 2021a) constructed from >500 non-redundant  
597 enterovirus polyprotein sequences. A FIMO motif search against human NINL was conducted  
598 using a 0.002 p-value threshold, which we previously determined was sufficient to capture of 95%  
599 of enterovirus cleavage sites (Tsu et al., 2021a). To enrich for cleavage sites that may be species-  
600 specific, sites in which there is variability in the P1 or P1' sites, which are the primary determinants  
601 of cleavage specificity (Tsu et al., 2021a), are reported.

602

#### 603 **NINL protease cleavage assays**

604 HEK293T cells were co-transfected with 100 ng of epitope-tagged human WT NINL, the NINL  
605 double mutant (Q827R, Q1032R), the NINL triple mutant (Q231R, Q827R, Q1032R), NINL  
606 isoform 2 or the NINL isoform 2 mutant (Q231R) and with 250 ng of HA-tagged protease-  
607 producing constructs for 3C<sup>pro</sup> assays or 5 ng for 3CL<sup>pro</sup> assays. Twenty-four hours post-  
608 transfection, the cells were harvested, lysed in 1x NuPAGE LDS sample buffer (Invitrogen)  
609 containing 5%  $\beta$ -mercaptoethanol (Thermo Fisher Scientific) and immunoblotted as described  
610 above.

611

### 612 **NINL virus cleavage assays**

613 HEK293T cells were transfected with 100 ng of epitope tagged human WT NINL, the NINL double  
614 mutant (Q827R, Q1032R), the NINL triple mutant (Q231R, Q827R, Q1032R), NINL isoform 2 or  
615 the NINL isoform 2 mutant (Q231R). At 24 h post-transfection, cells were infected with CVB3 or  
616 EMCV at a concentration of 250,000 PFU/well. Nine hours post-infection, the cells were  
617 harvested, lysed in 1x NuPAGE LDS sample buffer (Invitrogen) containing 5%  $\beta$ -mercaptoethanol  
618 (Thermo Fisher Scientific) and immunoblotted as described above.

619

### 620 **Immunofluorescence**

621 Cells were grown on fibronectin-coated acid-washed #1.5 glass coverslips. As applicable, cells  
622 underwent the desired treatment prior to a brief permeabilization with 300  $\mu$ l of 0.5 % TritonX-100  
623 (MilliporeSigma) in PHEM buffer: 60 mM piperazine-N,N'-bis(2-ethanesulfonic acid) (PIPES), 25  
624 mM 4-(2-hydroxyethyl)-1-piperazineethanesulfonic acid (HEPES), 10 mM Ethylene glycol-bis(2-  
625 aminoethylether)-N,N,N',N'-tetraacetic acid (EGTA), and 4 mM magnesium sulfate heptahydrate  
626 (MgSO<sub>4</sub>·7H<sub>2</sub>O). After five minutes, 100  $\mu$ l of a 4% (v/v) formaldehyde (Electron Microscopy  
627 Sciences, Hatfield, PA) and 0.5% (v/v) glutaraldehyde (Electron Microscopy Sciences) in PHEM  
628 solution was added slowly to the cells and allowed to incubate. After two minutes, all buffer was

629 aspirated from the cells and replaced with the same 4% (v/v) formaldehyde and 0.5% (v/v)  
630 glutaraldehyde in PHEM solution and incubated for 20 minutes at 37 °C. After this incubation, the  
631 cells were washed three times for five minutes each in PHEM-T (PHEM + 0.1 % TritonX-100).  
632 The cells were then blocked for one hour with a 5% secondary-matched serum solution in PHEM  
633 supplemented with 30 mM glycine. The blocking solution was then removed and the desired  
634 primary antibodies were added and incubated overnight at 4 °C. The following day the cells were  
635 washed three times for five minutes in PHEM-T and immunostained with the appropriate  
636 secondary antibodies for one hour at room temperature. The cells were then washed with PHEM-  
637 T and counter-stained with 4',6-diamidino-2-phenylindole (DAPI, Biotium, Fremont, CA). The cells  
638 and coverslips were mounted on glass slides with Prolong Glass Antifade Mountant (Thermo  
639 Scientific). See Supplementary File 2 for a list of all antibodies.

640

#### 641 **Confocal microscopy**

642 Cells were imaged using a CSU-W1 spinning disk confocal scanner unit (Yokogawa Electric  
643 Corporation, Musashino, Tokyo, Japan) coupled to a six-line (405 nm, 445nm, 488 nm, 514nm,  
644 561 nm, and 640 nm) LUN-F-XL laser engine (Nikon Instruments Incorporated, Melville, NY,  
645 USA). Emission light from the DAPI, Alexa Fluor 561, and Alexa Fluor 647 was filtered using a  
646 quad primary dichroic (405/488/568/647nm; Semrock, Rochester, NY, USA) and individual  
647 bandpass emission filters mounted within the W1 scan head for each channel (450/50, 595/50,  
648 and 700/70; Chroma Technology Corporation, Bellows Falls, VT). The W1 was mounted on a  
649 Nikon Ti2-E and an Apo TIRF 60x 1.49 NA objective was used to collect images. Image stacks  
650 were acquired using a piezo Z-insert (Mad City Labs, Madison, WI, USA). Illumination and image  
651 acquisition was controlled by NIS Elements Advanced Research software (Nikon Instruments  
652 Incorporated).

653

#### 654 **Peroxisome trafficking assay**

655 For imaging of peroxisome accumulation at the centrosome in the presence or absence of 3C<sup>pro</sup>  
656 or CVB3 infection, 25,000 U-2 OS cells were plated on fibronectin-coated coverslips and  
657 incubated overnight. For 3C<sup>pro</sup> transfected experiments, cells were transfected with the PEX3-  
658 Emerald-FKBP construct and either the cleavable NINL-FRB construct or the uncleavable NINL  
659 triple mutant construct with or without co-transfection of CVB3 3C<sup>pro</sup>. Eighteen hours after  
660 transfection, the cells were treated with or without 1  $\mu$ M rapalog (Takara Bio) for one hour prior to  
661 fixation. For CVB3 infections experiments, the cells were only transfected with the PEX3-Emerald-  
662 FKBP construct and either the cleavable NINL-FRB construct or the uncleavable NINL triple  
663 mutant construct. Eighteen hours after transfection, cells were infected with 250,000 PFU (MOI ~  
664 2) or mock infected. Five hours later, cells were treated with or without 1  $\mu$ M rapalog for one hour  
665 (for a total of six hours of infection) prior to fixation. Cells from both 3C<sup>pro</sup> experiments and CVB3  
666 infection experiments were fixed and immunostained as described above. Specifically, the  
667 centrosome was immunostained with anti-pericentrin rabbit polyclonal antibodies, goat anti-rabbit  
668 IgG (H + L) Alexa Fluor-647 (Thermo Fisher Scientific) and counterstained with DAPI prior to  
669 mounting. Z-stacks were acquired using a piezo Z stage. Separate image channels were acquired  
670 sequentially using bandpass filters for each channel DAPI: 455/50, PEX3-Emerald-FKBP: 525/50,  
671 pericentrin: 705/75.

672 Max intensity projections of Z-stacks were created in FIJI for each separate channel to  
673 quantify the peroxisome accumulation at the centrosome. The brightest pericentrin puncta in the  
674 647 channel was identified as the centrosome, and a 60 pixel-wide circle was drawn around it to  
675 create a region of interest (ROI). A whole cell ROI was then manually drawn by adjusting the  
676 brightness/contrast module's "Maximum" slider to saturate cellular boundaries. The fluorescence  
677 intensity at the centrosome and throughout the cell was then quantified by applying each ROI to  
678 the PEX3-Emerald-FKBP/488 channel. The percentage of total fluorescence present at the  
679 centrosome was calculated by dividing the intensity of fluorescence at the centrosome by the  
680 intensity of fluorescence throughout the cell. The area of the centrosome ROI was then divided

681 by the area of the whole cell ROI to calculate the percentage of the cell's area that the centrosome  
682 ROI comprised. The fluorescence intensity ratio was then divided by the area ratio and plotted  
683 using GraphPad Prism. Kruskal–Wallis with Dunn's post hoc test for multiple comparisons was  
684 performed using GraphPad Prism.

685

## 686 **Acknowledgements**

687

688 We thank members of the Daugherty and Reck-Peterson laboratories, as well as Patrick Mitchell,  
689 and Alistair Russell, for helpful suggestions and comments on the manuscript. We also thank the  
690 Nikon Imaging Center at UC San Diego and Dr. Eric Griffis for advice on imaging and analysis.  
691 This work was supported by grants from the National Institutes of Health (R35 GM133633 (MDD),  
692 R35 GM141825 ((SRP), the Pew Biomedical Scholars Program (MDD), Burroughs Wellcome  
693 Fund (MDD), and the Howard Hughes Medical Institute (SRP). Individual support was provided  
694 by the National Institutes of Health (T32 GM007240 to DAS, CB, BVT, and APR), the Howard  
695 Hughes Medical Institute Gilliam Fellowship (DAS), and the National Science Foundation GRFP  
696 (DAS and CB).

697

## 698 **Competing Interests**

699 The authors have no competing interests to declare.

700 **References**

- 701 Agrawal R, Gillies JP, Zang JL, Zhang J, Garrott SR, Shibuya H, Nandakumar J, DeSantis ME.  
702 2022. The KASH5 protein involved in meiotic chromosomal movements is a novel  
703 dynein activating adaptor (preprint). *Cell Biology*. doi:10.1101/2022.03.11.483947
- 704 Altschul SF, Gish W, Miller W, Myers EW, Lipman DJ. 1990. Basic local alignment search tool.  
705 *Journal of Molecular Biology* **215**:403–410. doi:10.1016/S0022-2836(05)80360-2
- 706 Bachmann-Gagescu R, Dona M, Hetterschijt L, Tonnaer E, Peters T, de Vrieze E, Mans DA, van  
707 Beersum SEC, Phelps IG, Arts HH, Keunen JE, Ueffing M, Roepman R, Boldt K,  
708 Doherty D, Moens CB, Neuhauss SCF, Kremer H, van Wijk E. 2015. The Ciliopathy  
709 Protein CC2D2A Associates with NINL and Functions in RAB8-MICAL3-Regulated  
710 Vesicle Trafficking. *PLoS Genet* **11**:e1005575. doi:10.1371/journal.pgen.1005575
- 711 Beachboard DC, Horner SM. 2016. Innate immune evasion strategies of DNA and RNA viruses.  
712 *Current Opinion in Microbiology* **32**:113–119. doi:10.1016/j.mib.2016.05.015
- 713 Bick MJ, Carroll J-WN, Gao G, Goff SP, Rice CM, MacDonald MR. 2003. Expression of the  
714 zinc-finger antiviral protein inhibits alphavirus replication. *J Virol* **77**:11555–11562.  
715 doi:10.1128/jvi.77.21.11555-11562.2003
- 716 Brandenburg B, Zhuang X. 2007. Virus trafficking - learning from single-virus tracking. *Nature*  
717 *reviews Microbiology* **5**:197–208.
- 718 Casenghi M, Meraldi P, Weinhart U, Duncan PI, Körner R, Nigg EA. 2003. Polo-like kinase 1  
719 regulates Nlp, a centrosome protein involved in microtubule nucleation. *Developmental*  
720 *cell* **5**:113–125.
- 721 Cason SE, Carman PJ, Van Duyne C, Goldsmith J, Dominguez R, Holzbaur ELF. 2021.  
722 Sequential dynein effectors regulate axonal autophagosome motility in a maturation-

- 723 dependent pathway. *Journal of Cell Biology* **220**:e202010179.  
724 doi:10.1083/jcb.202010179
- 725 Chaaban S, Carter AP. 2022. Structure of dynein-dynactin on microtubules shows tandem  
726 recruitment of cargo adaptors (preprint). *Molecular Biology*.  
727 doi:10.1101/2022.03.17.482250
- 728 Chen Y, Li C, Wang N, Wu Z, Zhang J, Yan J, Wei Y, Peng Q, Qi J. 2022. Identification of  
729 LINC00654-NINL Regulatory Axis in Diffuse Large B-Cell Lymphoma In Silico  
730 Analysis. *Front Oncol* **12**:883301. doi:10.3389/fonc.2022.883301
- 731 Daffis S, Szretter KJ, Schriewer J, Li J, Youn S, Errett J, Lin T-Y, Schnell S, Zust R, Dong H,  
732 Thiel V, Sen GC, Fensterl V, Klimstra WB, Pierson TC, Buller RM, Gale Jr M, Shi P-Y,  
733 Diamond MS. 2010. 2'-O methylation of the viral mRNA cap evades host restriction by  
734 IFIT family members. *Nature* **468**:452–456. doi:10.1038/nature09489
- 735 Daugherty MD, Malik HS. 2012. Rules of Engagement: Molecular Insights from Host-Virus  
736 Arms Races. *Annual Review of Genetics* **46**:677–700. doi:10.1146/annurev-genet-  
737 110711-155522
- 738 Daugherty MD, Schaller AM, Geballe AP, Malik HS. 2016. Evolution-guided functional  
739 analyses reveal diverse antiviral specificities encoded by IFIT1 genes in mammals. *eLife*  
740 **5**:e14228. doi:10.7554/eLife.14228
- 741 Dodding MP, Way M. 2011. Coupling viruses to dynein and kinesin-1. *The EMBO journal*  
742 **30**:3527–3539.
- 743 Döhner K, Nagel C-H, Sodeik B. 2005. Viral stop-and-go along microtubules: taking a ride with  
744 dynein and kinesins. *Trends in microbiology* **13**:320–327.



745 Dona M, Bachmann-Gagescu R, Texier Y, Toedt G, Hetterschijt L, Tonnaer EL, Peters TA, van  
746 Beersum SEC, Bergboer JGM, Horn N, de Vrieze E, Slijkerman RWN, van Reeuwijk J,  
747 Flik G, Keunen JE, Ueffing M, Gibson TJ, Roepman R, Boldt K, Kremer H, van Wijk E.  
748 2015. NINL and DZANK1 Co-function in Vesicle Transport and Are Essential for  
749 Photoreceptor Development in Zebrafish. *PLoS genetics* **11**:e1005574.

750 Duggal NK, Emerman M. 2012. Evolutionary conflicts between viruses and restriction factors  
751 shape immunity. *Nat Rev Immunol* **12**:687–695. doi:10.1038/nri3295

752 Enard D, Cai L, Gwennap C, Petrov DA. 2016. Viruses are a dominant driver of protein  
753 adaptation in mammals. *Elife* **5**. doi:10.7554/eLife.12469

754 Enard D, Petrov DA. 2018. Evidence that RNA Viruses Drove Adaptive Introgression between  
755 Neanderthals and Modern Humans. *Cell* **175**:360-371.e13. doi:10.1016/j.cell.2018.08.034

756 Fenton AR, Jongens TA, Holzbaur ELF. 2021. Mitochondrial adaptor TRAK2 activates and  
757 functionally links opposing kinesin and dynein motors. *Nat Commun* **12**:4578.  
758 doi:10.1038/s41467-021-24862-7

759 Gordon DE, Jang GM, Bouhaddou M, Xu J, Obernier K, White KM, O’Meara MJ, Rezelj VV,  
760 Guo JZ, Swaney DL, Tummino TA, Hüttenhain R, Kaake RM, Richards AL,  
761 Tutuncuoglu B, Foussard H, Batra J, Haas K, Modak M, Kim M, Haas P, Polacco BJ,  
762 Braberg H, Fabius JM, Eckhardt M, Soucheray M, Bennett MJ, Cakir M, McGregor MJ,  
763 Li Q, Meyer B, Roesch F, Vallet T, Mac Kain A, Miorin L, Moreno E, Naing ZZC, Zhou  
764 Y, Peng S, Shi Y, Zhang Z, Shen W, Kirby IT, Melnyk JE, Chorba JS, Lou K, Dai SA,  
765 Barrio-Hernandez I, Memon D, Hernandez-Armenta C, Lyu J, Mathy CJP, Perica T, Pilla  
766 KB, Ganesan SJ, Saltzberg DJ, Rakesh R, Liu X, Rosenthal SB, Calviello L,  
767 Venkataramanan S, Liboy-Lugo J, Lin Y, Huang X-P, Liu Y, Wankowicz SA, Bohn M,

768 Safari M, Ugur FS, Koh C, Savar NS, Tran QD, Shengjuler D, Fletcher SJ, O’Neal MC,  
769 Cai Y, Chang JCJ, Broadhurst DJ, Klippsten S, Sharp PP, Wenzell NA, Kuzuoglu-Ozturk  
770 D, Wang H-Y, Trenker R, Young JM, Cavero DA, Hiatt J, Roth TL, Rathore U,  
771 Subramanian A, Noack J, Hubert M, Stroud RM, Frankel AD, Rosenberg OS, Verba KA,  
772 Agard DA, Ott M, Emerman M, Jura N, von Zastrow M, Verdin E, Ashworth A,  
773 Schwartz O, d’Enfert C, Mukherjee S, Jacobson M, Malik HS, Fujimori DG, Ideker T,  
774 Craik CS, Floor SN, Fraser JS, Gross JD, Sali A, Roth BL, Ruggero D, Taunton J,  
775 Kortemme T, Beltrao P, Vignuzzi M, García-Sastre A, Shokat KM, Shoichet BK, Krogan  
776 NJ. 2020. A SARS-CoV-2 protein interaction map reveals targets for drug repurposing.  
777 *Nature* **583**:459–468. doi:10.1038/s41586-020-2286-9

778 Ho SN, Biggar SR, Spencer DM, Schreiber SL, Crabtree GR. 1996. Dimeric ligands define a  
779 role for transcriptional activation domains in reinitiation. *Nature* **382**:822–826.  
780 doi:10.1038/382822a0

781 Hoffmann H-H, Schneider WM, Rice CM. 2015. Interferons and viruses: an evolutionary arms  
782 race of molecular interactions. *Trends Immunol* **36**:124–138. doi:10.1016/j.it.2015.01.004

783 Htet ZM, Gillies JP, Baker RW, Leschziner AE, DeSantis ME, Reck-Peterson SL. 2020. LIS1  
784 promotes the formation of activated cytoplasmic dynein-1 complexes. *Nat Cell Biol*  
785 **22**:518–525. doi:10.1038/s41556-020-0506-z

786 Huynh W, Vale RD. 2017. Disease-associated mutations in human BICD2 hyperactivate motility  
787 of dynein–dynactin. *Journal of Cell Biology* **216**:3051–3060. doi:10.1083/jcb.201703201

788 Ilan-Ber T, Ilan Y. 2019. The role of microtubules in the immune system and as potential targets  
789 for gut-based immunotherapy. *Molecular Immunology* **111**:73–82.  
790 doi:10.1016/j.molimm.2019.04.014

- 791 Jassal B, Matthews L, Viteri G, Gong C, Lorente P, Fabregat A, Sidiropoulos K, Cook J,  
792 Gillespie M, Haw R, Loney F, May B, Milacic M, Rothfels K, Sevilla C, Shamovsky V,  
793 Shorser S, Varusai T, Weiser J, Wu G, Stein L, Hermjakob H, D'Eustachio P. 2020. The  
794 reactome pathway knowledgebase. *Nucleic Acids Res* **48**:D498–D503.  
795 doi:10.1093/nar/gkz1031
- 796 Johnson B, VanBlargan LA, Xu W, White JP, Shan C, Shi P-Y, Zhang R, Adhikari J, Gross ML,  
797 Leung DW, Diamond MS, Amarasinghe GK. 2018. Human IFIT3 Modulates IFIT1 RNA  
798 Binding Specificity and Protein Stability. *Immunity* **48**:487-499.e5.  
799 doi:10.1016/j.immuni.2018.01.014
- 800 Kapitein LC, Schlager MA, van der Zwan WA, Wulf PS, Keijzer N, Hoogenraad CC. 2010.  
801 Probing Intracellular Motor Protein Activity Using an Inducible Cargo Trafficking  
802 Assay. *Biophysical Journal* **99**:2143–2152. doi:10.1016/j.bpj.2010.07.055
- 803 Kast DJ, Dominguez R. 2017. The Cytoskeleton–Autophagy Connection. *Current Biology*  
804 **27**:R318–R326. doi:10.1016/j.cub.2017.02.061
- 805 Katoh K. 2002. MAFFT: a novel method for rapid multiple sequence alignment based on fast  
806 Fourier transform. *Nucleic Acids Research* **30**:3059–3066. doi:10.1093/nar/gkf436
- 807 Kersten FF, van Wijk E, Hetterschijt L, Bauß K, Peters TA, Aslanyan MG, van der Zwaag B,  
808 Wolfrum U, Keunen JE, Roepman R, Kremer H. 2012. The mitotic spindle protein  
809 SPAG5/Astrin connects to the Usher protein network postmitotically. *Cilia* **1**:2.
- 810 Kosakovsky Pond SL, Frost SDW. 2005. Not So Different After All: A Comparison of Methods  
811 for Detecting Amino Acid Sites Under Selection. *Molecular Biology and Evolution*  
812 **22**:1208–1222. doi:10.1093/molbev/msi105

- 813 Labun K, Montague TG, Gagnon JA, Thyme SB, Valen E. 2016. CHOPCHOP v2: a web tool for  
814 the next generation of CRISPR genome engineering. *Nucleic Acids Res* **44**:W272-276.  
815 doi:10.1093/nar/gkw398
- 816 Latner DR, Thompson JM, Gershon PD, Storrs C, Condit RC. 2002. The positive transcription  
817 elongation factor activity of the vaccinia virus J3 protein is independent from its  
818 (nucleoside-2'-O-) methyltransferase and poly(A) polymerase stimulatory functions.  
819 *Virology* **301**:64–80. doi:10.1006/viro.2002.1538
- 820 Lau CK, O'Reilly FJ, Santhanam B, Lacey SE, Rappsilber J, Carter AP. 2021. Cryo-EM reveals  
821 the complex architecture of dynactin's shoulder region and pointed end. *EMBO J*  
822 **40**:e106164. doi:10.15252/embj.2020106164
- 823 Lee I-G, Cason SE, Alqassim SS, Holzbaur ELF, Dominguez R. 2020. A tunable LIC1-adaptor  
824 interaction modulates dynein activity in a cargo-specific manner. *Nat Commun* **11**:5695.  
825 doi:10.1038/s41467-020-19538-7
- 826 Lei J, Hilgenfeld R. 2017. RNA-virus proteases counteracting host innate immunity. *FEBS Lett*  
827 **591**:3190–3210. doi:10.1002/1873-3468.12827
- 828 Liu Y, Salter HK, Holding AN, Johnson CM, Stephens E, Lukavsky PJ, Walshaw J, Bullock SL.  
829 2013. Bicaudal-D uses a parallel, homodimeric coiled coil with heterotypic registry to  
830 coordinate recruitment of cargos to dynein. *Genes Dev* **27**:1233–1246.  
831 doi:10.1101/gad.212381.112
- 832 Love MI, Huber W, Anders S. 2014. Moderated estimation of fold change and dispersion for  
833 RNA-seq data with DESeq2. *Genome Biol* **15**:550. doi:10.1186/s13059-014-0550-8
- 834 Luby-Phelps K. 2000. Cytoarchitecture and physical properties of cytoplasm: volume, viscosity,  
835 diffusion, intracellular surface area. *International review of cytology* **192**:189–221.

- 836 Man SM, Kanneganti T-D. 2016. Converging roles of caspases in inflammasome activation, cell  
837 death and innate immunity. *Nat Rev Immunol* **16**:7–21. doi:10.1038/nri.2015.7
- 838 McCune BT, Lanahan MR, tenOever BR, Pfeiffer JK. 2020. Rapid Dissemination and  
839 Monopolization of Viral Populations in Mice Revealed Using a Panel of Barcoded  
840 Viruses. *J Virol* **94**:e01590-19. doi:10.1128/JVI.01590-19
- 841 McKenney RJ, Huynh W, Tanenbaum ME, Bhabha G, Vale RD. 2014. Activation of  
842 cytoplasmic dynein motility by dynactin-cargo adapter complexes. *Science (New York,*  
843 *NY)* **345**:337–341.
- 844 Meyerson NR, Sawyer SL. 2011. Two-stepping through time: mammals and viruses. *Trends in*  
845 *Microbiology* **19**:286–294. doi:10.1016/j.tim.2011.03.006
- 846 Mostowy S, Shenoy AR. 2015. The cytoskeleton in cell-autonomous immunity: structural  
847 determinants of host defence. *Nat Rev Immunol* **15**:559–573. doi:10.1038/nri3877
- 848 Murrell B, Wertheim JO, Moola S, Weighill T, Scheffler K, Kosakovsky Pond SL. 2012.  
849 Detecting Individual Sites Subject to Episodic Diversifying Selection. *PLoS Genet*  
850 **8**:e1002764. doi:10.1371/journal.pgen.1002764
- 851 Ng CS, Stobart CC, Luo H. 2021. Innate immune evasion mediated by picornaviral 3C protease:  
852 Possible lessons for coronaviral 3C-like protease? *Rev Med Virol* **31**:1–22.  
853 doi:10.1002/rmv.2206
- 854 Olenick MA, Holzbaur ELF. 2019. Dynein activators and adaptors at a glance. *J Cell Sci* **132**.  
855 doi:10.1242/jcs.227132
- 856 Passmore JB, Nijenhuis W, Kapitein LC. 2021. From observing to controlling: Inducible control  
857 of organelle dynamics and interactions. *Current Opinion in Cell Biology* **71**:69–76.  
858 doi:10.1016/j.ceb.2021.02.002

- 859 Patro R, Duggal G, Love MI, Irizarry RA, Kingsford C. 2017. Salmon provides fast and bias-  
860 aware quantification of transcript expression. *Nat Methods* **14**:417–419.  
861 doi:10.1038/nmeth.4197
- 862 Radtke K, Döhner K, Sodeik B. 2006. Viral interactions with the cytoskeleton: a hitchhiker’s  
863 guide to the cell. *Cellular Microbiology* **8**:387–400.
- 864 Reck-Peterson SL, Redwine WB, Vale RD, Carter AP. 2018. The cytoplasmic dynein transport  
865 machinery and its many cargoes. *Nature Reviews Molecular Cell Biology* **19**:382–398.  
866 doi:10.1038/s41580-018-0004-3
- 867 Redwine WB, DeSantis ME, Hollyer I, Htet ZM, Tran PT, Swanson SK, Florens L, Washburn  
868 MP, Reck-Peterson SL. 2017. The human cytoplasmic dynein interactome reveals novel  
869 activators of motility. *eLife* **6**:379.
- 870 Rothenburg S, Brennan G. 2020. Species-Specific Host–Virus Interactions: Implications for  
871 Viral Host Range and Virulence. *Trends in Microbiology* **28**:46–56.  
872 doi:10.1016/j.tim.2019.08.007
- 873 Schlager MA, Hoang HT, Urnavicius L, Bullock SL, Carter AP. 2014. In vitro reconstitution of a  
874 highly processive recombinant human dynein complex. *The EMBO journal* **33**:1855–  
875 1868.
- 876 Schoggins JW. 2019. Interferon-Stimulated Genes: What Do They All Do? *Annu Rev Virol*  
877 **6**:567–584. doi:10.1146/annurev-virology-092818-015756
- 878 Seksek O, Biwersi J, Verkman AS. 1997. Translational Diffusion of Macromolecule-sized  
879 Solutes in Cytoplasm and Nucleus. *Journal of Cell Biology* **138**:131–142.  
880 doi:10.1083/jcb.138.1.131

- 881 Tenthorey JL, Emerman M, Malik HS. 2022. Evolutionary Landscapes of Host-Virus Arms  
882 Races. *Annu Rev Immunol* **40**:271–294. doi:10.1146/annurev-immunol-072621-084422
- 883 Terawaki S, Yoshikane A, Higuchi Y, Wakamatsu K. 2015. Structural basis for cargo binding  
884 and autoinhibition of Bicaudal-D1 by a parallel coiled-coil with homotypic registry.  
885 *Biochemical and Biophysical Research Communications* **460**:451–456.  
886 doi:10.1016/j.bbrc.2015.03.054
- 887 Tsu B, Beierschmitt C, Ryan AP, Agarwal R, Mitchell PS, Daugherty MD. 2021a. Diverse viral  
888 proteases activate the NLRP1 inflammasome. *eLife* **10**:e60609. doi:10.7554/eLife.60609
- 889 Tsu B, Fay EJ, Nguyen KT, Corley MR, Hosuru B, Dominguez VA, Daugherty MD. 2021b.  
890 Running With Scissors: Evolutionary Conflicts Between Viral Proteases and the Host  
891 Immune System. *Front Immunol* **12**:769543. doi:10.3389/fimmu.2021.769543
- 892 Urnavicius L, Zhang K, Diamant AG, Motz C, Schlager MA, Yu M, Patel NA, Robinson CV,  
893 Carter AP. 2015. The structure of the dynactin complex and its interaction with dynein.  
894 *Science (New York, NY)* **347**:1441–1446.
- 895 van Wijk E, Kersten FFJ, Kartono A, Mans DA, Brandwijk K, Letteboer SJF, Peters TA, Märker  
896 T, Yan X, Cremers CWRJ, Cremers FPM, Wolfrum U, Roepman R, Kremer H. 2009.  
897 Usher syndrome and Leber congenital amaurosis are molecularly linked via a novel  
898 isoform of the centrosomal ninein-like protein. *Human molecular genetics* **18**:51–64.
- 899 Wang Y, Huynh W, Skokan TD, Lu W, Weiss A, Vale RD. 2019. CRACR2a is a calcium-  
900 activated dynein adaptor protein that regulates endocytic traffic. *Journal of Cell Biology*  
901 **218**:1619–1633. doi:10.1083/jcb.201806097

- 902 Weaver S, Shank SD, Spielman SJ, Li M, Muse SV, Kosakovsky Pond SL. 2018. Datamonkey  
903 2.0: A Modern Web Application for Characterizing Selective and Other Evolutionary  
904 Processes. *Molecular Biology and Evolution* **35**:773–777. doi:10.1093/molbev/msx335
- 905 Woods Acevedo MA, Erickson AK, Pfeiffer JK. 2019. The Antibiotic Neomycin Enhances  
906 Cocksackievirus Plaque Formation. *mSphere* **4**:e00632-18. doi:10.1128/mSphere.00632-  
907 18
- 908 Xiao W, Yeerken D, Li J, Li Z, Jiang L, Li D, Fu M, Ma L, Song Y, Zhang W, Zhan Q. 2021.  
909 Nlp promotes autophagy through facilitating the interaction of Rab7 and FYCO1. *Signal*  
910 *Transduct Target Ther* **6**:152. doi:10.1038/s41392-021-00543-1
- 911 Yang Z. 2007. PAML 4: Phylogenetic Analysis by Maximum Likelihood. *Molecular Biology*  
912 *and Evolution* **24**:1586–1591. doi:10.1093/molbev/msm088
- 913 Yu H, Bruneau RC, Brennan G, Rothenburg S. 2021. Battle Royale: Innate Recognition of  
914 Poxviruses and Viral Immune Evasion. *Biomedicines* **9**:765.  
915 doi:10.3390/biomedicines9070765

916

## 917 **Figure Legends**

918

919 **Figure 1. The dynein activating adaptor, NINL, has evolved under positive selection in**  
920 **primates. (A)** A schematic of the cytoplasmic dynein-1 transport machinery, which includes  
921 dynein and dynactin subunits (blue) and an activating adaptor (orange). Dynein moves toward  
922 the minus end of microtubules (blue arrow). **(B)** A scatterplot displaying evolutionary signatures  
923 of selection for 23 dynein and dynactin genes (blue) and 13 dynein activating adaptor genes  
924 (orange). The x-axis displays the rate of non-synonymous changes (dN) divided by the rate of  
925 synonymous changes (dS) in the coding sequence across primate evolution. The y-axis displays



926 the calculated probability of the gene having evolved under positive selection using PAML.  
927 Complete data are found in Figure 1–figure supplement 1. **(C)** A schematic of human NINL isoform  
928 1 with EF hand (dark grey) and coiled-coil (light grey) domains shown. The amino-terminal  
929 dynein/dynactin binding region and the carboxy-terminal candidate cargo binding domains are  
930 indicated. Sites of positive selection predicted by three evolutionary models are shown as colored  
931 arrows: PAML (light red), FEL (blue), MEME (orange). A full list of sites and their calculated  
932 probabilities are shown in Figure 1–figure supplement 2. **(D)** Full-length NINL, the dynein/dynactin  
933 binding amino-terminus of NINL and the candidate cargo binding carboxy-terminus of NINL were  
934 analyzed for signatures of positive selection. Select dN/dS and p-values are shown, with  
935 additional evolutionary data in Figure 1–figure supplement 3.

936  
937 **Figure 2. The antiviral potency of IFN $\alpha$  is reduced in NINL KO cells.** **(A)** Immunoblots of WT  
938 A549 cells, and CRISPR/Cas9-generated NINL and NIN KO A549 cells probed with the indicated  
939 antibodies. GAPDH served as a loading control. Protein molecular weight markers are shown in  
940 kilodaltons (kDa) to the left of each immunoblot. Representative images from three biological  
941 replicates are shown. **(B)** WT, NINL KO, and NIN KO A549 cells were treated with 100U IFN $\alpha$  for  
942 24 hours and then infected with VSV (5000 PFU/mL, MOI  $\approx$  0.01). Virus-containing supernatants  
943 were collected nine hours post-infection and viral titers (y-axis, plaque forming units per mL) were  
944 determined by plaque assay. **(C)** WT or NINL KO U-2 OS cells were treated with 100U IFN $\alpha$  for  
945 24 hours and then infected with VSV (5000 PFU/mL, MOI  $\approx$  0.01). Virus-containing supernatant  
946 was collected nine hours post-infection and viral titers (y-axis, plaque forming units per mL) were  
947 determined by plaque assay. **(D)** WT or NINL KO A549 cells were treated with 100U IFN $\alpha$  for 24  
948 hours and then infected with Sindbis virus (500,000 PFU/mL, MOI  $\approx$  1.0) (left) or treated with  
949 1000U IFN $\alpha$  for 24 hours and then infected with coxsackievirus B3 (5000 PFU/mL, MOI  $\approx$  0.01)  
950 (right). Virus-containing supernatants were collected 24 hours post-infection and viral titers (y-

951 axis, plaque forming units per mL) were determined by plaque assay. **(B-D)** Data are presented  
952 as mean  $\pm$  standard deviation of three biological replicates, with individual points shown. Data  
953 were analyzed by two-way ANOVA with Tukey's method adjustment for multiple comparisons for  
954 IFN $\alpha$  treatment within each cell line, two-way ANOVA interaction comparison for IFN $\alpha$  interaction  
955 between cell lines. \* $p < 0.05$ , \*\* $p < 0.01$ , \*\*\* $p < 0.001$ , \*\*\*\* $p < 0.0001$ , ns = not significant.

956

957 **Figure 2–figure supplement 1. Validation of CRISPR/Cas9-editing to generate NINL and NIN**  
958 **KO cells.** **(A)** Confocal micrographs displayed as maximum intensity projections of WT and NINL  
959 KO A549 cells. Immunostaining with anti-pericentrin and anti-tubulin antibodies was used to  
960 visualize centrosomes and microtubules, respectively. Nuclei were visualized with DAPI. 15  $\mu$ m  
961 scale bars are shown in the merged micrographs. Dashed white lines denote cellular  
962 boundaries. Representative micrographs from two biological replicates are shown. **(B)** Sequence  
963 verification of exon 2-targeted NINL KO A549 cells. An excerpt of the WT *NINL* sequence is  
964 shown with the CRISPR-targeting sgRNA and PAM sequences indicated (top), the sequencing  
965 chromatogram (middle), and the sequence of the NINL KO (bottom). **(C)** Sequence verification of  
966 exon 5-targeted NIN KO A549 cells. **(D)** Immunoblots of control (CTRL) HCT116 and U-2 OS  
967 cells, and CRISPR/Cas9-generated NINL and NIN KO HCT116 and U-2 OS cells probed with the  
968 indicated antibodies. GAPDH served as a loading control. Protein molecular weight markers are  
969 shown in kilodaltons (kDa) to the left of each immunoblot. Representative images from three  
970 biological replicates are shown. **(E)** Sequence verification of exon 2-targeted NINL KO U-2 OS  
971 cells. **(F)** Sequence verification of exon 6-targeted NINL KO HCT116 cells. **(G)** Sequence  
972 verification of exon 3-targeted NIN KO HCT116 cells.

973

974 **Figure 2–figure supplement 2. Reduction of IFN $\alpha$ -mediated antiviral response is observed**  
975 **across multiple cell lines.** **(A)** A549 WT, NINL KO, or NIN KO cells were treated with 100U IFN $\alpha$   
976 for 24 hours, then infected with Sindbis virus (500,000 PFU/mL, MOI  $\approx$  1.0). Cells were collected

977 24 hours post-infection and viral titers (y-axis, plaque forming units per mL) were determined by  
978 plaque assay. WT and NINL KO data are reproduced from Figure 2D for comparison. **(B)** U-2 OS  
979 WT or NINL KO cells were treated, infected, harvested, and quantified as described in **(A)**. **(C)**  
980 A549 WT, NINL KO, or NIN KO cells were treated with 1000U IFN $\alpha$  for 24 hours, then infected  
981 with coxsackievirus B3 (5,000 PFU/mL, MOI  $\approx$  0.01). Cells were collected 24 hours post-infection  
982 and viral titers (y-axis, plaque forming units per mL) were determined by plaque assay. WT and  
983 NINL KO data are reproduced from Figure 2D for comparison. **(D)** U-2 OS WT or NINL KO cells  
984 treated, infected, harvested, and quantified as described in (C). (A-D) Data are presented as  
985 mean  $\pm$  standard deviation of three biological replicates, with individual points shown. Data were  
986 analyzed by two-way ANOVA with Tukey's method adjustment for multiple comparisons for IFN $\alpha$   
987 treatment within each cell line, two-way ANOVA interaction comparison for IFN $\alpha$  interaction  
988 between cell lines. \*p<0.05, \*\*p<0.01, \*\*\*p<0.001, \*\*\*\*p<0.0001, ns = not significant.

989  
990 **Figure 3. NINL KO cells fail to mount an effective IFN response.** **(A)** Immunoblot of extracts  
991 from WT, NINL KO, and NIN KO A549 cells untreated (-) or treated (+) with IFN $\alpha$ . Immunoblots  
992 were probed with anti-STAT2, anti-Phospho-STAT2 (Tyr690), anti-STAT1, anti-Phospho-STAT1  
993 (Tyr701), anti-Mx1, anti-IFIT3, anti-OAS1, anti-ISG15, and anti- $\beta$ -actin antibodies. Predicted  
994 protein molecular weights are shown in kilodaltons (kDa) to the left of each immunoblot.  
995 Representative images from three biological replicates are shown. **(B)** Differential ISG expression  
996 in WT, NINL KO, and NIN KO cells induced with IFN $\alpha$ . ISGs were identified as the 88 genes  
997 whose expression was upregulated in WT cells after IFN $\alpha$  pretreatment (Figure 3-figure  
998 supplement 2). Experiments were performed with three biological replicates. Data are displayed  
999 as a violin plot of ISG expression in NIN KO or NINL KO cells relative to WT cells. \*\*\*\* = p<0.0001  
1000 based on paired t-test. Dotted line indicates mean. Individual data points for ISGs shown in panel  
1001 **(A)** are indicated. **(C)** A549 WT cells were treated with 1000U IFN $\alpha$  for 24 hours, then infected  
1002 with wild-type vaccinia virus (WT VacV) or J3 mutant vaccinia virus (J3 VacV) (50,000 PFU/mL,

1003 MOI  $\approx$  0.1). Cell-associated virus was collected 24 hours post-infection and viral titers (y-axis,  
1004 plaque forming units per mL) were determined by plaque assay. **(D)** A549 NINL KO cells were  
1005 treated, infected, harvested, and quantified as described in (C). (C-D) Data are presented as  
1006 mean  $\pm$  standard deviation of three biological replicates, with individual points shown. Data were  
1007 analyzed by two-way ANOVA with Tukey's method adjustment for multiple comparisons for IFN $\alpha$   
1008 treatment within each cell line, two-way ANOVA interaction comparison for IFN $\alpha$  interaction  
1009 between cell lines. \*\*\*\* $p$ <0.0001, ns = not significant.

1010

1011 **Figure 3–figure supplement 1. Reduced ISG production occurs following NINL KO in**  
1012 **multiple cell lines generated using different CRISPR gRNAs** Immunoblot of extracts from WT,  
1013 NINL KO, NIN KO HCT116 cells and WT and NINL KO U-2 OS cells untreated or treated with  
1014 IFN $\alpha$ . Immunoblots were probed with anti-STAT2, anti-Phospho-STAT2 (Tyr690), anti-STAT1,  
1015 anti-Phospho-STAT1 (Tyr701), anti-Mx1, anti-IFIT3, anti-OAS1, anti-ISG15, and anti- $\beta$ -actin  
1016 antibodies. Predicted protein molecular weights are shown in kilodaltons (kDa) to the left of each  
1017 immunoblot. Representative images from three biological replicates are shown.

1018

1019 **Figure 3–figure supplement 2. Identification of 88 ISGs in WT A549 cells.** Differential gene  
1020 expression from RNAseq analyses of WT A549 cells pretreated with IFN $\alpha$  compared to untreated.  
1021 Each condition (untreated or IFN $\alpha$ ) was performed with three biological replicates, with  
1022 independent RNA extractions, sequencing library preparation, and sequencing. RNA levels for a  
1023 total of 14102 genes (grey dots) could be compared (see Materials and Methods and  
1024 Supplementary File 4). Only 88 genes (red dots) showed a statistically significant upregulation  
1025 (adjusted  $p$ -value  $\leq$ 0.05,  $\log_2$ -fold change  $\geq$ 1), which we refer to in subsequent analyses as ISGs.

1026

1027 **Figure 3–figure supplement 3. Interferon induction has a reduced effect on ISG expression**  
1028 **in NINL KO cells.** Differential gene expression of 88 ISGs (identified in Figure 3–figure

1029 supplement 2) from RNAseq analyses of the indicated cell lines pretreated with IFN $\alpha$  compared  
1030 to untreated. Each condition (untreated or IFN $\alpha$ ) was performed with three biological replicates,  
1031 with independent RNA extractions, sequencing library preparation, and sequencing. Only the 88  
1032 genes significantly upregulated in WT cells, which we refer to as ISGs (adjusted p-value  $\leq 0.05$ ,  
1033  $\log_2$ -fold change  $\geq 1$ ), are shown for each cell line. Data are displayed as a violin plot of ISG  
1034 upregulation, with the dotted line indicating the mean. \*\*\*\*p $< 0.0001$  based on one-way ANOVA  
1035 test.

1036

1037 **Figure 3—figure supplement 4. Differential gene expression in NINL KO and NIN KO cells**

1038 **compared to WT cells. (A)** Differential gene expression from RNAseq analyses of NINL KO cells  
1039 treated with IFN $\alpha$  compared to WT A549 cells treated with IFN $\alpha$ . Each cell line (NINL KO or WT)  
1040 was treated with IFN $\alpha$  with three biological replicates, with independent RNA extractions,  
1041 sequencing library preparation, and sequencing. RNA levels for a total of 18563 genes (grey dots)  
1042 could be compared (see Materials and Methods and Supplementary File 4). Orange dots highlight  
1043 the 72 ISGs that are significantly differentially expressed between cell lines, with the majority (66  
1044 of 72) of ISGs significantly lower in NINL KO cells (adjusted p-value  $\leq 0.05$ ,  $\log_2$ -fold change  $\leq -$   
1045 1). **(B)** Differential gene expression from RNAseq analyses of NIN KO cells treated with IFN $\alpha$   
1046 compared to WT A549 cells treated with IFN $\alpha$ . RNA levels for a total of 15794 genes (grey dots)  
1047 could be compared (see Materials and Methods and Supplementary File 4). Dark grey dots  
1048 highlight the 11 ISGs that are significantly differentially expressed between cell lines. **(C)**  
1049 Reactome pathway analysis (Jassal et al., 2020) of the 3549 genes with significantly lower  
1050 expression (adjusted p-value  $\leq 0.05$ ,  $\log_2$ -fold change  $\leq -1$ ) in NINL KO cells treated with IFN $\alpha$   
1051 relative to WT cells treated with IFN $\alpha$ . Only the two pathways shown were identified as  
1052 significantly different between the cell lines. The number of genes found to be lower in NINL KO  
1053 cells (# entities found) compared to the number of genes in the indicated pathway (# entities total)  
1054 is shown. The p-value, as well as false discovery rate (FDR) adjusted p-values are shown.

1055

1056 **Figure 3—figure supplement 5. NINL KO results in loss of interferon sensitivity of the VacV**  
1057 **J3 mutant.**

1058 (A) A549 NIN KO cells were treated with 1000U IFN $\alpha$  for 24 hours, then infected with wildtype  
1059 vaccinia virus (VacV WT) or J3 mutant vaccinia virus (J3 VacV) (50,000 PFU/mL, MOI  $\approx$  0.1).  
1060 Cell-associated virus was collected 24 hours post-infection and viral titers (y-axis, plaque forming  
1061 units per mL) were determined by plaque assay. (B) U-2 OS WT cells were treated with 1000U  
1062 IFN $\alpha$  for 24 hours, then infected with wild-type vaccinia virus or J3 mutant vaccinia virus (50,000  
1063 PFU/mL, MOI  $\approx$  0.1). Cells were collected 24 hours post-infection and viral titers (y-axis, plaque  
1064 forming units per mL) were determined by plaque assay. (C) U-2 OS NINL KO cells were treated,  
1065 infected, harvested, and collected as indicated in (B). (A-C) Data are presented as mean  $\pm$   
1066 standard deviation of three biological replicates, with individual points shown. Data were analyzed  
1067 by two-way ANOVA with Tukey's method adjustment for multiple comparisons for IFN $\alpha$  treatment  
1068 within each viral infection, two-way ANOVA interaction comparison for IFN $\alpha$  interaction between  
1069 viral infections. \*\*p<0.01, \*\*\* p<0.001, ns = not significant.

1070

1071 **Figure 4. NINL is cleaved at species-specific sites by virally encoded proteases. (A)**

1072 Schematic of human NINL, with positions of predicted 3C<sup>pro</sup> cleavage sites annotated. Shown are  
1073 the four amino acids on each side of the predicted cleavage site in human NINL, along with the  
1074 residue positions and cleavage score predicted using a motif search with the consensus  
1075 enterovirus cleavage site (see Methods). (B) NINL sequences from 12 primate species and mice  
1076 for each predicted 3C<sup>pro</sup> cleavage site. Amino acid changes relative to human NINL are highlighted  
1077 in colors to denote differences in polarity and charge. (C) Schematic of 3xFLAG-NINL-Myc  
1078 isoform 1 and isoform 2 constructs, with predicted molecular weights for both amino-terminal  
1079 (FLAG) and carboxy-terminal (Myc) products upon cleavage by 3C<sup>pro</sup>. (D) Immunoblots of extracts  
1080 from HEK293T cells co-transfected with the indicated NINL constructs and either CVB3 3C<sup>pro</sup> or

1081 the catalytically inactive (C147A) CVB3 3C<sup>pro</sup> (mutant). Immunoblots were probed with anti-FLAG  
1082 (NINL amino-terminus), anti-Myc (NINL carboxy-terminus), anti-HA (3C<sup>pro</sup>), and anti-GAPDH  
1083 (loading control). Arrows to the left of each immunoblot indicate full-length products as well as  
1084 products corresponding to cleavage at the indicated amino acid residue. Protein molecular weight  
1085 markers are shown in kilodaltons (kDa) to the right of each immunoblot. Representative images  
1086 from three biological replicates are shown. **(E)** Immunoblots of extracts from HEK293T cells  
1087 transfected with the indicated amino-terminal FLAG and carboxyl-terminal Myc tagged NINL  
1088 constructs and infected with either CVB3 or EMCV (500,000 PFU/mL, MOI  $\approx$  1.0 for 8 h).  
1089 Immunoblots were probed with anti-FLAG (NINL amino-terminus), anti-Myc (NINL carboxy-  
1090 terminus), and anti-GAPDH (loading control). Arrows to the left of each immunoblot indicate full  
1091 length products as well as products corresponding to CVB3 3C<sup>pro</sup> cleavage at the indicated amino  
1092 acid residue. Protein molecular weight markers are shown in kilodaltons (kDa) to the right of each  
1093 immunoblot. Representative images from three biological replicates are shown.

1094

1095 **Figure 4—figure supplement 1. 3C and 3CL proteases from diverse viruses cleave NINL at**  
1096 **redundant and unique sites. (A)** Immunoblots of extracts from HEK293T cells co-transfected  
1097 with the indicated NINL constructs and 3C<sup>pro</sup> from the indicated picornavirus. CVB3:  
1098 coxsackievirus B3, CVB3 mutant: catalytically inactive (C147A) CVB3 3C<sup>pro</sup>, EV71: enterovirus  
1099 A71, PV1: poliovirus 1, EV68: enterovirus D68, HRVA: human rhinovirus A, EMCV:  
1100 encephalomyocarditis virus, Parecho: parechovirus A, HepA: hepatitis A virus, Sali: salivirus A.  
1101 Immunoblots were probed with anti-Myc (NINL carboxy-terminus), anti-HA (3C<sup>pro</sup>), and anti-  
1102 GAPDH (loading control). Arrows to the left of each immunoblot indicate full-length products as  
1103 well as products corresponding to CVB3 3C<sup>pro</sup> cleavage at the indicated amino acid residue.  
1104 Protein molecular weight markers are shown in kilodaltons (kDa) to the right of each immunoblot.  
1105 Representative images from three biological replicates are shown. **(B)** Immunoblots of extracts  
1106 from HEK293T cells co-transfected with the indicated NINL constructs and the indicated

1107 coronaviral 3CL<sup>pro</sup>. SARS2: SARS-CoV-2, SARS2 mutant: catalytically inactive (C145A) SARS-  
1108 CoV-2 3CL<sup>pro</sup> SARS1: SARS-CoV, NL63: HCoV-NL63. 3CL<sup>proS</sup> were expressed as self-cleaving  
1109 constructs that remove a carboxy-terminal mCherry-HA tag. Immunoblots were probed with anti-  
1110 Myc (NINL carboxy-terminal), anti-HA (cleaved mCherry-HA from catalytically active protease  
1111 constructs, or eGFP-3CL<sup>pro</sup>-mCherry-HA from catalytically inactive protease constructs), and anti-  
1112 GAPDH (loading control). Arrows to the left of each immunoblot indicate full-length products as  
1113 well as products corresponding to SARS-CoV-2 3CL<sup>pro</sup> cleavage at the indicated amino acid  
1114 residue. Protein molecular weight markers are shown in kilodaltons (kDa) to the right of each  
1115 immunoblot. Representative images from three biological replicates are shown.

1116

1117 **Figure 5. CVB3 3C<sup>pro</sup> cleavage of NINL prevents rapalog-induced dynein-dependent**  
1118 **transport of intracellular cargoes.** (A) Schematic of the peroxisomal trafficking assay. The  
1119 peroxisomal targeting signal (PTS1) of human PEX3 (amino acids 1–42) was fused to mEmerald  
1120 and FKBP and a truncated NINL (amino acids 1-1062) was fused to FRB. Dynein-dependent  
1121 accumulation of peroxisomes at the centrosome, where most minus-ends are located, is initiated  
1122 by the rapalog-mediated heterodimerization of FKBP and FRB. Blue arrow indicates dynein  
1123 motility. (B) Indicated FRB and FKBP constructs transiently expressed with (+) or without (-) the  
1124 transient co-expression of HA-tagged CVB3 3C<sup>pro</sup> in HEK293T cells. Immunoblots were probed  
1125 with anti-FLAG, anti-FKBP, anti-GAPDH and anti-HA antibodies. Protein molecular weight  
1126 markers are shown in kilodaltons (kDa) to the left of each immunoblot. Representative images  
1127 from three biological replicates are shown. (C) Confocal micrographs are displayed as maximum  
1128 intensity projections of U-2 OS cells, transfected with Pex3-mEmerald-FKBP and the indicated  
1129 cleavable or uncleavable NINL-FRB fusion constructs with or without the co-expression of CVB3  
1130 3C<sup>pro</sup>. Where indicated, cells were treated for one hour with ethanol (EtOH) as a control or 1  $\mu$ M  
1131 rapalog in EtOH prior to fixation. Centrosomes were immunostained with anti-pericentrin and  
1132 nuclei were visualized with DAPI. 15  $\mu$ m scale bars indicated in lower left corner of merged



1133 micrographs. Yellow rectangles denote region of cropped inset. Dashed white lines denote  
1134 cellular boundaries. Representative micrographs from three biological replicates are shown. **(D)**  
1135 Schematic of the analysis pipeline. **(E)** Quantification of peroxisomal trafficking assays from three  
1136 biological replicates. The fluorescence intensity of Pex3-mEmerald-FKBP at the centrosome was  
1137 normalized to the whole-cell fluorescence, and to the areas of the regions of interest used to  
1138 quantify centrosome versus whole-cell fluorescence. Each datapoint corresponds to an individual  
1139 cell. The dark grey, large, outlined circles correspond to the mean for each biological replicate.  
1140 For each condition  $n = \sim 80$ . The mean across all replicates is denoted by the bold line. Data were  
1141 analyzed using Kruskal–Wallis with Dunn’s post hoc test for multiple comparisons. \*\*\*\* $p < 0.0001$ ,  
1142 ns = not significant.

1143

1144 **Figure 5–figure supplement 1. Peroxisome distribution remains consistent regardless of**  
1145 **presence of CVB3 3C<sup>pro</sup> prior to rapalog induced dynein-dependent transport. (A)**

1146 Schematic of NINL-FRB fusion constructs. Predicted molecular weights for each 3xFLAG tagged  
1147 amino-terminal cleavage product produced by 3C<sup>pro</sup>. **(B)** Peroxisome distribution controls.  
1148 Confocal micrographs displayed as maximum intensity projections of U-2 OS cells, transfected  
1149 with Pex3-mEmerald-FKBP and the indicated cleavable or uncleavable NINL-FRB fusion  
1150 constructs with or without the co-expression of CVB3 3C<sup>pro</sup> treated for one hour with ethanol  
1151 (EtOH) prior to fixation. Centrosomes were immunostained with anti-pericentrin and nuclei were  
1152 visualized with DAPI. 15  $\mu\text{m}$  scale bars are indicated in the lower left corner of the merged  
1153 micrographs. Yellow rectangles denote region of cropped inset. Dashed white lines denote  
1154 cellular boundaries. Representative micrographs from three biological replicates are shown. **(C)**  
1155 Quantification of peroxisomal trafficking assay from three biological replicates. The fluorescence  
1156 intensity of Pex3-mEmerald-FKBP at the centrosome was normalized to the whole-cell  
1157 fluorescence, and to the areas of the regions of interest used to quantify centrosome versus  
1158 whole-cell fluorescence. Each datapoint corresponds to an individual cell and biological replicates

1159 can be distinguished by shade. For each condition  $n = \sim 80$ . The mean across all replicates is  
1160 denoted by the bold line. Bold circles correspond to the mean for each biological replicate. Data  
1161 were analyzed using Kruskal–Wallis with Dunn’s post hoc test for multiple comparisons. ns = not  
1162 significant.

1163

1164 **Figure 6. Cleavage of NINL during viral infection prevents dynein-dependent transport of**

1165 **an intracellular cargo. (A)** Confocal micrographs displayed as maximum intensity projections of

1166 uninfected or CVB3 infected U-2 OS cells. Cells were transfected with Pex3-mEmerald-FKBP and

1167 the indicated cleavable or uncleavable NINL-FRB fusion constructs, and infected (or mock

1168 infected) with CVB3 (500,000 PFU/ml, MOI =  $\sim 2$ ) for five hours. Cells were then treated for one

1169 hour with ethanol (EtOH) or 1  $\mu$ M rapalog prior to fixation. Centrosomes were immunostained with

1170 anti-pericentrin and nuclei were visualized with DAPI. 15  $\mu$ m scale bars are indicated in the lower

1171 left corner of the merged micrographs. Yellow rectangles denote region of cropped inset. Dashed

1172 white lines denote cellular boundaries. Representative micrographs from three biological

1173 replicates are shown. **(B)** Quantification of peroxisomal trafficking assays from three biological

1174 replicates. The fluorescence intensity of Pex3-mEmerald-FKBP at the centrosome was

1175 normalized to the whole-cell fluorescence, and to the areas of the regions of interest used to

1176 quantify centrosome versus whole-cell fluorescence. Each datapoint corresponds to an individual

1177 cell and biological replicates can be distinguished by shade. For each condition  $n = \sim 80$ . The

1178 mean across all replicates is denoted by the bold line. Bold circles correspond to the mean for

1179 each biological replicate. Data were analyzed using Kruskal–Wallis with Dunn’s post hoc test for

1180 multiple comparisons. \*\*\*\* $p < 0.0001$ , ns = not significant. **(C)** Schematic of the rapalog-induced

1181 pericentrosomal accumulation of peroxisomes and loss of accumulation upon viral infection.

1182

1183 **Figure 6–figure supplement 1. Peroxisome distribution remains consistent regardless of**

1184 **CVB3 infection prior to rapalog induced dynein-mediated transport. (A)** Peroxisome

1185 distribution controls. Confocal micrographs displayed as maximum intensity projections of  
1186 uninfected or CVB3 infected U-2 OS cells expressing Pex3-mEmerald-FKBP and the indicated  
1187 cleavable or uncleavable NINL-FRB fusion constructs treated for one hour with ethanol (EtOH)  
1188 prior to fixation. Centrosomes were immunostained with anti-pericentrin and nuclei were stained  
1189 with DAPI. 15  $\mu$ m scale bars are indicated in the lower left corner of the merged micrographs.  
1190 Yellow rectangles denote region of cropped inset. Dashed white lines denote cellular  
1191 boundaries. Representative micrographs from three biological replicates are shown. **(B)**  
1192 Quantification of peroxisomal trafficking assays from three biological replicates. Fluorescence  
1193 intensity of Pex3-mEmerald-FKBP at the centrosome was normalized to the whole-cell  
1194 fluorescence, and to the areas of the regions of interest used to quantify centrosome versus  
1195 whole-cell fluorescence. Each datapoint corresponds to an individual cell and biological replicates  
1196 can be distinguished by shade. For each condition  $n = \sim 80$ . The mean across all replicates is  
1197 denoted by a bold line. Bold circles correspond to the mean for each biological replicate. Data  
1198 were analyzed using Kruskal–Wallis with Dunn’s post hoc test for multiple comparisons. ns = not  
1199 significant.

1200

## 1201 **Supplementary Files**

1202

1203 **Supplementary File 1. Evolutionary analyses on dynein, dynactin, and activating adapter**  
1204 **genes.** Statistics from PAML analyses on individual dynein, dynactin, and activating adapter  
1205 genes.

1206

1207 **Supplementary File 2. Codon positions in NINL predicted to be evolving under positive**  
1208 **selection.** NINL codon positions and probability scores from PAML, FEL, and MEME analyses.

1209

1210 **Supplementary File 3. Evolutionary analysis of N-terminal and C-terminal domains of NINL.**

1211 Statistics from PAML analyses on NINL full length, N-terminal domain only, and C-terminal  
1212 domain only.

1213

1214 **Supplementary File 4. Differentially regulated transcripts in WT A549, NINL KO, and NIN**

1215 **KO cell lines induced and uninduced with IFN.** Results from DEseq comparison from RNAseq  
1216 of indicated cell lines and under different induction conditions.

1217

1218 **Supplementary File 5. List of primers and gBlocks used.** Spreadsheet that details the  
1219 generation or sourcing of all plasmids used throughout this study.

1220

1221 **Supplementary File 6. List of antibodies used for immunoblots and immunofluorescence.**

1222 Spreadsheet that details each antibody name, manufacturer, catalog number, and dilutions used.

1223

1224 **Figure 2-source data 1. Full raw unedited images for Figure 2A.**

1225

1226 **Figure 2-source data 2. Individual data values for Figure 2B- D.**

1227

1228 **Figure 2-Figure supplement 1-source data 1. Full raw unedited images for Figure 2-Figure**  
1229 **supplement 1D.**

1230

1231 **Figure 2-Figure supplement 2-source data 1. Individual data values for Figure 2-Figure**  
1232 **supplement 2A-D.**

1233

1234 **Figure 3-source data 1. Full raw unedited images for Figure 3A.**

1235

1236 **Figure 3-source data 2. Individual data values for Figure 3C.**

1237

1238 **Figure 3-Figure supplement 1-source data 1. Full raw unedited images for Figure 3-Figure**  
1239 **supplement 1.**

1240

1241 **Figure 3-Figure supplement 5-source data 1. Individual data values for Figure 3-Figure**  
1242 **supplement 5A-C.**

1243

1244 **Figure 4-source data 1. Full raw unedited images for Figure 4D-E.**

1245

1246 **Figure 4-Figure supplement 1-source data 1. Full raw unedited images for Figure 4-Figure**  
1247 **supplement 1A-B.**

1248

1249 **Figure 5-source data 1. Full raw unedited images for Figure 5B.**

1250

1251 **Figure 5-source data 2. Individual data values for Figure 5E and Figure 5-Figure**  
1252 **supplement 1C.**

1253

1254 **Figure 6-source data 1. Individual data values for Figure 6B and Figure 6-Figure**  
1255 **supplement 1B.**
